# Supplementary material for: Ice crystal number concentration from measurements of lidar, cloud radar and radar wind profiler
Source: Copernicus journal article supplement (doi:10.5194/amt-2019-154), 2019-04-26
Supplement: Supplementary file [file amt-2019-154-AC1-supplement.pdf]

## ***Revision of “Ice crystal number concentration from measurements of lidar, cloud radar and radar wind profiler”,***

*Johannes Bühl, Patric Seifert, Martin Radenz, Holger Baars, and Albert Ansmann*

*(Leibniz Institute for Tropospheric Research, Permoserstr. 15, 04318 Leipzig, Germany, [buehl@tropos.de](mailto:buehl@tropos.de))*

We thank both reviewers for their thorough analysis and comments to our paper. Below we list our answers to these comments together with a description of the applied changes.

### **Referee #1:**

Received and published: 30 June 2019

The derivation of ice crystal number concentration is an important task to better understand the effect on and off ice clouds. This paper presents a method to derive the ice crystal number concentration from a set of active remote sensing instruments and is thus highly suited for presentation in AMT. I suggest only a few minor points that could be addressed before publication of this article:

In your introduction you describe shortly current existing methods to derive ice crystal number concentration, i.e. using lidar and radar or multi-wavelength radar methods. You mention that each of these methods has its limitations. In your method you use a combination of either CR+RWP or CR+lidar. What is the detection limit of the different instruments to detect clouds? Can you give an assumption of the benefit of the proposed method in comparison to the others mentioned here (number)? What about regions with very low ice optical thickness / very small ice crystals where only lidar measurements can detect the cloud? Isn't there still a limitation with this method to investigate ice crystal number concentration for these thin clouds. This should be addressed in the manuscript.

The method presented here has its limitations in the detection limits of the single instruments. Detection limits of the cloud radar (-55dBZ at 5km) and that of the lidar (about  $1\text{e-}6\text{ Mm}^{-1}$ ) are now mentioned in the discussion section (p. 19 l. 1).

For the combination of lidar/cloud radar methods exist and are well studied. In principle, any of the recent algorithms (e.g. DARDAR) could be run also with ground-based instrumentation. A specific advantage – and the actually new development presented in this paper – results from the combination of radar wind profiler and cloud radar. The method is limited by the capability of the cloud radar to detect particles and by the detection limits of the RWP concerning the velocity of clear air. Both detection limits are essentially independent. The RWP has a detection limit of about -30dBZ at 5km and about 90% coverage for wind measurements at 6km height. The detection limits of the cloud radar of -55dBZ at 5km height translates into a possible detection of about 10...100 columnar-shaped ice particles per cubic meter with 600...1000 $\mu$ m median Diameter. Those small particle concentrations would under most circumstances not be detected by a lidar, hence, it brings an advantage that the only extensive measurement parameter used by the method is Z from the cloud radar (given an additional detection of air velocity of the RWP).

We added a paragraph about this topic to the discussion (p. 16 | 25).

You do your study using side planes and column-like particles. How different would it look like, if other shapes are taken into account. Are these particle shapes enough to address all regions / stages of the cloud? What about small pristine ice particles?

Usage of a wrong ice particle shape usually ends up with no or a very exotic solution. E.g. if columnar ice particles are present with a relatively large terminal fall velocity of 1m/s, the retrieval with side planes would simply fail because these particles would never reach this terminal fall velocity in a pristine state.

Small pristine particles are best covered by the method, because the parameterizations (especially columns and hexagonal plates) work well down to very small sizes of about 10 $\mu$ m).

The description of the results is very short.

We added a new Figure showing the histograms of the retrieved distributions of  $N$  and  $F$  throughout the whole cloud case. These plots show the natural stray of the results within the cloud case and are mostly caused by changes in particle properties. The uncertainties of the individual measurement points are now shown in Figs. 8 and 9. Table 3 now gives a comprehensive overview about the resulting  $N$  and  $F$  and the corresponding errors for the height of 4500m.

We extended the results section to be more descriptive with a depiction of the retrieval results of  $N$  and  $F$  as a collection of histograms. Additionally, a new case study with the combined measurements of Lidar, CR and RWP was added. (See comment 3 of Reviewer #2).

The results for using CR+RWP and CR+lidar look quite different (Figure 8). Can you give a better comparison of the both methods. How do you deal with that in your studies. Do you use the different methods for different parts of the clouds? If yes, how is that done? If no, what about clouds in which none of the methods can be applied for the whole cloud?

We have intentionally selected a case study in which both methods are applicable. Later, we also want to apply the CR/RWP method to clouds in which Lidar is attenuated, but first we want to research the capabilities of both methods together. The most simple solution for the application in strongly changing conditions would be to have a sophisticated error analysis at all heights. Larger errors would then limit the influence of the corresponding measurement value to the retrieval and increase the overall errors of the retrieval. Currently, we regret that our error estimation is not yet sophisticated enough to yield usable errors for all heights automatically, so we still have to estimate the errors for the input variables.

Can you give a more quantitative comparison of the results using the different assumed particle shapes?

A comment on the errors resulting from different particle shapes was added to p.14 l. 7.

Figure 5: Please use the same range of D for both methods.

Thank you for this advice, we fixed the scale accordingly.

## **Referee #2:**

The manuscript describes a methodology that aims at estimating the ice crystal number concentration ( $N_i$ ) and ice crystal number flux  $F_i$  ( $N_i$  multiplied by the terminal fall velocity  $v_t$ ) based on combined measurements from a ground-based cloud radar (CR) and a radar wind profiler (RWP) or lidar. More specifically, the authors present here two retrieval methods that can independently be used depending on instrumental availability. A first method uses the CR reflectivity ( $Z$ ) and spectral width ( $w$ ) and the RWP  $v_t$  to constrain parameters of a particle size distribution (PSD) and infer  $N_i$  and  $F_i$ . Alternatively, in the absence of RWP measurements, the lidar extinction ( $E$ ) is instead used in combination with  $Z$ . The authors describe the theoretical basis for these methods, which are based on rather sophisticated LUT approach, and propose a brief uncertainty analyses. Finally, a case study representative of a mixed-phase cloud is discussed.

There is high scientific interest for this work, as only few methods are today dedicated to remote-sensing retrievals of  $N_i$ , despite the importance of this parameter to better understand ice clouds and represent them in models. A particular novelty of the approach proposed in this manuscript is its strong focus on radar measurements and the use of a RWP. Indeed, other existing methods for  $N_i$  retrievals strongly depend on lidar and/or thermal infrared measurements and therefore perform poorly in optically thick ice clouds. The idea presented here is thus very interesting, but I still have a some major concerns regarding some aspects of the retrieval method, detailed in the comments below. Also, I would have liked to see more analyses of the retrievals, especially since the authors indicate in Sec.2 that measurements are available during a 4-month period and later in the conclusion that the retrieval method is very fast. But this paper already constitutes a first step and the manuscript is well within the scope of AMT. The manuscript is well written, although can be a bit difficult to follow in its most technical sections. Overall, I recommend publication of the manuscript after major revision, provided appropriate response to the comments below.

## **General comments:**

1. My first general comment concerns the use of a LUT approach, which appears as a strong limitation here considering the great instrumental synergy that could be obtained here. I was wondering why this choice, until the very last paragraph of the conclusion where it is finally justified. There are clearly advantages of going for a LUT approach (keeping a clearer view of the physical aspects, retrieval speed), which are mentioned by the authors, but I can't help but think so much more could be done with a variational method: all measurements could be used

simultaneously, and a proper sensitivity / error estimates study could be performed (see my following two comments). Obviously, the authors shouldn't switch to a variational method for this study, but such discussion must be addressed earlier in the manuscript, and I strongly encourage the authors to migrate to a more flexible method in the future.

A sophisticated forward iteration approach would be an appropriate solution for the problem. We are actually working on that but so far we have to admit that we have no such approach ready. However, we see specific advantages of the LUT that we want to push forward and explore.

- We see strong advantages in the calculation speed and in simplicity in application and portability.
- The original idea behind the LUT approach was its ability to show all results at once. If the particle species are involved is a free parameter, there is a certain danger that a forward iteration gets stuck in a local minimum, neglecting possible other solutions nearby. Within one particle type that turned out not to be a problem and since we are currently selecting particle species manually this is no big issue in the current state of our work. However, if in future a forward iteration approach is used, the LUT may be able to provide a single or many starting points for the forward iteration.

2. I have issues with the error analysis done in section 3.5 and summarized in table 2. Uncertainties on retrievals should have two origins: first, the propagation of errors due to non-retrieved parameters (here  $p$ ,  $T$ ,  $s$ , particle shape, parameters of  $M(D)$  and  $A(D)$  relations, ...) and instrumental accuracy (here  $v_t$ ,  $Z/E$ ,  $w$ ), and second the sensitivity of these measurements to the parameters to be retrieved. It seems that only the first aspect is addressed here? And, if so, why not include the errors due to the choice of a particle shape in Table2? Since this is also a non-retrieved parameter, it should appear there. It would also be good to attribute uncertainties on the assumed parameters of the mass-diameter and area-diameter relations. Finally, showing directly the relative uncertainties on  $N_i$  and  $F_i$  in table 2 would be clearer for the reader.

Technically it is possible to set particle shape as a retrieved variable. However, the only measured parameter directly sensitive to particle shape would be cloud radar linear depolarization ratio (LDR), which is difficult to forward model and only rarely measured throughout the cloud case due to limitations in instrumental sensitivity. To avoid ambiguous results, we analyze the particle type manually and set it fixed for the whole cloud case. Otherwise the retrieved results would alternate between different particle types, introducing additional complications into the analysis.

Errors originating from the mass and area parameterizations and the calculation of terminal fall velocities are difficult to assess. Heymsfield and Westbrook (2010) found out that the method of Mitchell (1996) performs especially well for pristine ice crystals with observed differences in terminal fall velocity below 20%. The distribution of these errors also seems to be randomly distributed. For rimed ice crystals the error tends to increase significantly. Since conditions under which rimed particles occur are left out of this study, this can be ruled out as a major source of error. Also introduction of an additional exponent into the calculation of Best numbers as proposed by Heymsfield and Westbrook (2010) does not show any significant differences.

We added this sentence to the discussion of uncertainties (p. 14, l. 7 and to the result section (p. 16, l. 11ff). We also included the lidar and radar errors into the calculation of  $N$  and  $F$  now in table 2 (in the other estimations of uncertainties the measurement errors have already been included).

3. Why are the CR, RWP and lidar not all used together if they are available simultaneously. The authors seem to hint at a redundancy between the information in  $v_t$  and  $Z/E$ , but the case study shows that should be different type of information. And it is also expected that the lidar ( $E$ ) carries information on a different part of the PSD (small particles) compared to the CR and RWP. The authors indeed show in the case study that there is almost no difference between the mean  $N_i$  and  $F_i$  retrieved by both methods if the “side-planes” shape is used whereas very large differences between the two methods appear for “plate-like” particles. Doesn’t this indicate that there is information on the particle shape that could be further constrained by simultaneously using all available measurements?

(See answer two question 2)

In any case, the discrepancies between the results from both methods should be further discussed.

It is actually possible to use the method in a combined way, using  $\mathbf{m}=(Z/E, v_t, w)$  as an measurement vector. This kind of evaluation is now also shown and discussed in the results section. In this context we dropped the additional comparison of retrieval results between different particle types and concentrate the analysis on particle type “plate-like”. This particle type is according to our knowledge the best choice for this case.

The most notable difference using  $\mathbf{m}=(Z/E, v_t, w)$  is that the results stray less and the errors are smaller. Probably, in the Lidar/CR and CR/RWP approach random noise and biases in the measurements translate into a noisy but complete time-

height field of results with large errors. The combined approach will only select measurements in which  $Z/E$  and  $v_t$  fit together.

We also discuss briefly the differences between the three retrieval modes in the results and discussion section.

4. Finally, it would be useful to explicit more clearly in the abstract or conclusion the conditions under which the retrieval methods can be applied. For instance, p8 l6: “only small pristine particles are considered in the context of this work” (and what does “small” mean?). Same p4 l17. Also, do these retrieval methods only apply to thick and relatively warm mixed-phase clouds as illustrated in the case study?

We removed “small” from the study and only mention “pristine” which better describes our priorities. (In principle, all particle with clearly defined shape for which an area and mass power law is known can be treated.)

This is now mentioned in the text.

Specific comments:

5. The study by Delanoë et al. [2005] is cited as a reference to the shape of the PSD used in this study (gamma-modified, Eq. 1), which is the most central element of the retrieval method. The authors also indicate, p3 l9-10, that “this kind of distribution was described by Delanoë et al. [2005] as being universally applicable for ice crystal populations”. First, a main conclusion by Delanoë et al. [2005] (or, more recently, Delanoë et al. [2014]) is that, **when properly normalized**, PSDs tend to fold into a unique universal modified-gamma distribution shape. By normalized it is meant that the concentration and size axes of the PSD are normalized in order to remove dependency on parameters that are important to the shape (in the case of Delanoë et al. [2005], it is IWC and  $D_m$  that become constant after normalization). I do not see mention of this central aspect in the text. It seems from Eq. 1 that  $D$  is indeed normalized by  $D_m$  and that there is a normalization coefficient for the concentration ( $C$ ), but the latter isn’t discussed anymore. Please comment. Second, the PSD shape in Eq.1 does not correspond to a gamma-modified PSD, but it does correspond to a gamma- $\mu$  indeed mentioned in Delanoë et al. [2005] but that was found to be a less accurate representation of in situ PSDs than the gamma-modified shape. Please clarify.

We use the gamma- $\mu$  distribution because it allows control about both the shape and the size variable with two free parameters. We refrained from using the gamma-modified distribution because there were three free parameters in it. But from the perspective of your comment we think, usage of a gamma-modified

distribution with some fixed parameters would also make sense. We integrated it as an option to the software which will be published with the manuscript. Meanwhile, we also see that the shape parameter of the distribution seems only to play a major role under extreme conditions. So, indeed, switching to a gamma-modified distribution could be a good option to make the algorithm more stable.

The introduction was modified accordingly (p. 3 l. 10), the gamma- $\mu$  distribution is now correctly named and referenced and the normalization parameter  $C$  is defined properly (p. 6 l. 21).

6. p2 l11, and onward in the paragraph - there are many mentions of “crystal size”, please define more clearly what you mean by that (maximum size, effective size?). Or do you mean the PSD? This confusion happens often in the text. For instance, p9 l19, “ice particle size  $D$  is the most crucial intensive parameter for the retrieval of  $N$ ” - is it  $D$  or  $N(D)$  that is crucial to  $N$  (I’d agree on the latter)? Similarly, in p3 l8 there is mention of a median diameter  $D_m$ , could you explicit what you mean by this? As Delanoë et al. [2005] is mentioned, is it the mean volume-weighted diameter (ratio of 4th to 3rd moment of the PSD)?

$D$  is always the maximum Diameter of a single particle and  $D_m$  the median Diameter of the particle size distribution.

We tried to make this clear throughout the text.  $D$  is now described at p. 4 l. 19. Wherever applicable we replaced “particle size” by the corresponding symbol ( $D$  or  $D_m$ ). “particle size distribution” was replaced by “PSD” throughout the text.

7. p2 l13: Ceccaldi et al. [2013] describes a method to infer a cloud classification (phase) from lidar-radar measurements, this is not an appropriate reference here (again p16 l3). If you refer to the DARDAR-CLOUD algorithm, then perhaps Cazenave et al. [2019] or Delanoë and Hogan [2010] would be appropriate, but none of these papers discuss of  $N_i$  retrievals either. As far as I know, only Mitchell et al. [2018] and Sourdeval et al. [2018] describe satellite products of  $N_i$ . The former paper uses thermal infrared and lidar measurements, the latter uses lidarradar measurements. Additionally, Sourdeval et al. [2018] showed that  $N_i$  retrievals using lidar measurements only are possible for cold ice clouds, so the statement p2 l14 is not absolutely correct. However, it indeed seem that their satellite retrievals are indeed poor when the lidar is missing.

Thank you for this insight. We tried to improve the introduction according to these comments with updated descriptions of the cited papers. Additionally, we cite Mitchell et al. (2018).



8. Appendix B lacks references or details. Some are given p9 l21-22, and that seems sufficient to justify Eq.9, so perhaps Appendix B is not necessary?

We think Appendix B is important for the sake of completeness and for easy reproducibility of our method. It shows how to actually calculate the terminal fall velocities which are central to this work.

We now introduce the chapter with references to the relevant papers.

9. Table A1 lists  $m(D)$  and  $A(D)$  coefficients for all sorts of shapes, many of which aren't used. Is it useful to indicate them all?

We mention all possible shapes for the sake of completeness, since there is no principle limit in application of the method as long the particle shape is known.

10.  $n_L$  and  $i_L$  are inconsistent between the equations p10 and Fig.6. Also, in Fig6b, what are the space coordinates  $x_i$ ?

The coordinates were designated  $x_i$  in order to have a general approach. We decided to drop this idea and make the coordinate system specific in order to be consistent between the figures and the text.

#### Technical comments:

11. p6 l2 - typo, "cloumn-like"

Done

12. p6 l4 - "particle shapes" rather than "particle species"?

Done

13. p9 l19 - type, "parameter"

Done

14. p9 l28 - wrong citation format

Exchanged (Fukuta and Takahashi, 1999) to Fukuta and Takahashi (1999)

15. p10 l19 - D or  $D_m$ ?

Exchanged  $D \rightarrow D_m$

16. p13 l2 - bold  $m$  (vector) or  $m_i$  (element)? There are other similar inconsistencies in this section.

Exchanged  $m$  to  **$m$**  and  $e$  to  **$e$**  at all occurrences of the measurement vector / error vector.

17. p13 l1 - can you define “precisely”? What are exactly the elements of  $m$ ? Are  $p$  and  $T$  included?

We reformulated the paragraph in order to explain that the vector can hold all variables, but later only  $v_t$ ,  $w$  and  $Z/E$  are used.

18. p13 l15 - does “the desired vector  $r$ ” corresponds to the retrieved properties? (understood from Fig. 6 but not detailed in the text)

We defined vector  $r$  in the text-

19. Fig. 5 - is it  $D$  or  $D_m$  on the y-axis?

It is indeed  $D_m$

**Additional changes due to internal review:**

- Table A2: aggregates thin plates → aggregate mixtures (This was a typo. In the analysis always the “aggregate mixtures” type has been used for parameterizing the upper end of the plate-like crystals because the fall velocity parameterization matches best with “hexagonal plates”.)
- Plot color scales N1 → N, F1 → F
- A reference to Hogan et al. (2006) has been added after Eq. 1.
- Symbol  $s$  has been exchanged to  $\sigma_{total}$  in the whole paper.

# Ice crystal number concentration from measurements of lidar, cloud radar and radar wind profiler

Johannes Bühl<sup>1</sup>, Patric Seifert<sup>1</sup>, Martin Radenz<sup>1</sup>, Holger Baars<sup>1</sup>, and Albert Ansmann<sup>1</sup>

<sup>1</sup>Leibniz Institute for Tropospheric Research, Permoserstr. 15, 04318 Leipzig, Germany

**Correspondence:** Johannes Bühl (buehl@tropos.de)

**Abstract.** A new method for the retrieval of ice particle number concentrations from combined active remote-sensing measurements of Raman lidar, cloud radar and radar wind profiler is presented. We exploit – for the first time – measurements of terminal fall velocity together with radar reflectivity factor and/or lidar-derived particle extinction coefficient in clouds for retrieving the number concentration of pristine ice particles with presumed particle shapes. A lookup table approach for the retrieval of the properties of the particle size distribution from observed parameters is presented. Analysis of methodological uncertainties and error propagation is performed, which shows that a retrieval of ice particle number concentration based on terminal fall velocity is possible within the order of magnitude. Comparison between a retrieval of number concentration based on terminal fall velocity on the one hand and lidar and cloud radar on the other shows agreement within the uncertainties of the retrieval.

## 1 Introduction

Aerosols, clouds and precipitation are major components of Earth’s climate system. The complex aerosol-cloud-dynamics interaction currently poses major challenges for numerical modeling of climate and weather phenomena because the majority of rain formation on Earth happens through the ice phase (Mülmenstädt et al., 2015). The process of heterogeneous ice nucleation in clouds is of particular importance because it constitutes the link between aerosol conditions – including ice nucleating particle concentration (INPC) – and precipitation formation. An understanding of ice nucleation and growth is necessary for understanding precipitation formation, cloud stability (Korolev et al., 2017), secondary ice formation (Sullivan et al., 2017), and cloud radiative transfer (Sun and Shine, 1994). It is, hence, a key process for the global weather and climate system which must be understood in detail in order to make accurate predictions about cloud and precipitation patterns in state-of-the-art numerical weather forecast and future climate projections.

Up to date, ice nucleation cannot be observed directly in the atmosphere, but we are gaining the ability to retrieve ice crystal number concentration (ICNC, furtherly designated  $N$ ) and the respective ice crystal number flux ( $F$ ). Both are promising approaches to gain quantitative information about ice nucleation in clouds. Apart from  $N$ ,  $F = N \times v_t$  (with  $v_t$  the terminal fall velocity) is especially well suited to derive the rate of ice production in clouds. An illustration of the use of  $F$  in comparison with  $N$  is given in Fig. 1.  $F$  of falling ice particles yields a direct measure of the rate of ice production in the cloud above. Bühl et al. (2016) estimated ice mass fluxes produced in well-constrained shallow stratiform cloud layers. Based on these

measurements, information about the contribution of ice precipitation on the mass balance of the mixed-phase cloud layer was retrieved.

Aircraft observations have been used frequently for measuring  $N$  and  $F$  via optical measurement of the particle size distribution (PSD) of ice crystals (Eidhammer et al., 2010; Westbrook and Illingworth, 2013; Voigt et al., 2017). Such observations can indeed deliver a quantitative picture of  $N$  and the shape of particles, but since they take place at only one height level, the actual level of ice formation is often not known and blurring the resulting long-term statistics. Ground-based remote sensing provides accurate information about the ice nucleation level. However, retrieving  $N$  from remote sensing measurements is extremely challenging. Especially, freshly created pristine ice crystals pose challenges in this context because they vary strongly in shape over different ranges of ice nucleation temperature which sensitively influences the accuracy of retrievals and model results (Simmel et al., 2015).

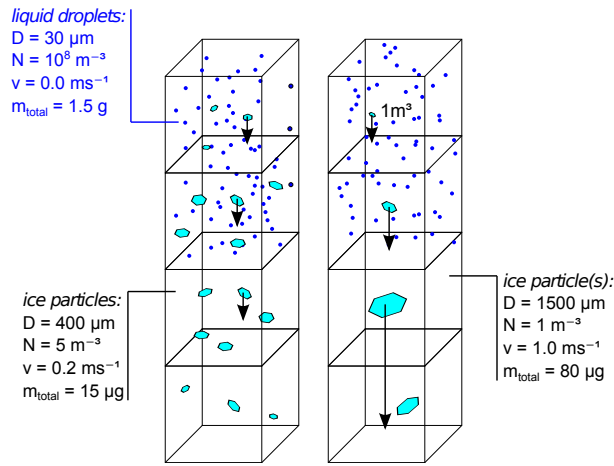

**Figure 1.** Comparison of two clouds with different ice crystal number concentrations  $N$  but with the same ice crystal number flux  $F = 1 \text{ m}^{-2} \text{ s}^{-1}$  ( $F = N \times v_t$  with  $v_t$  terminal fall velocity) and, hence, also the same rate of ice production: (a) Higher ice crystal number concentration ( $N$ ) but less total ice mass and (b) lower  $N$  and higher total ice mass.

Today, all remote-sensing approaches for retrieving  $N$  need a priori information about crystal size before being able to derive  $N$ . Extensive observational variables like lidar-derived optical particle extinction  $E$  or radar reflectivity factor  $Z$  can then be used to retrieve  $N$ . Hence, the task of deriving an estimation of particle size is central for deriving  $N$ . Different methods exist for retrieving a proxy for particle size. Mitchell et al. (2018) use a combination of active and passive remote-sensing sensors in order to constrain the properties of the observed cloud particles. Cazenave et al. (2019), Delanoë and Hogan (2010) and Sourdeval et al. (2018) employ a forward iteration method in order to obtain an estimation of  $N$  from combined observations of spaceborne lidar and cloud radar. Employing these techniques, an estimation of  $N$  based on assumptions (e.g., on particle shape) is well constrained if both lidar and cloud radar (CR; Görsdorf et al. (2015)) observations are available. This method exploits the strong wavelength dependence in the efficiency of backscatter signal between lidar (geometrical scattering) and

radar (Rayleigh/Mie scattering) for ice particles. In optically thick clouds, where only CR measurements are available, the method falls back to parameterizations of particle size and retrieval of  $N$  is no longer possible. Also multi-frequency radar observations have been introduced for measurement of particle sizes (Battaglia et al., 2014; Sekelsky et al., 1999; Kneifel et al., 2011). However, such methods do not work for pristine particles (diameter smaller than about 1 mm, Battaglia et al. (2014)). For these particles, only the terminal fall velocity  $v_t$  leaves traces about particle size, but actual observations of  $v_t$  are difficult to obtain. Such observations have been made in laboratories (Fukuta and Takahashi, 1999) and, recently, Bühl et al. (2015) and Radenz et al. (2018) showed that a combinations of CR and radar wind profiler (RWP; Steinhagen et al. (1998); Lehmann and Teschke (2001)) can be used in order to derive  $v_t$  of ice particles.

In the present work, we make use of these new measurements and present an alternative approach for retrieval of  $N$  that works in the presence of very small pristine ice crystals and in clouds which cannot be penetrated by lidar.  $v_t$  and spectral width  $w$  obtained from combined Doppler spectra observed with CR and RWP are used to derive median Diameter ( $D_m$ ) and the shape parameter  $\mu$  of a gamma- $\mu$  distribution. This kind of distribution is mentioned and shortly discussed in Delanoë et al. (2005) as one option for universally applicable PSD for ice crystal populations. A forward model approach based on a lookup table of numerically derived microphysical and observed parameters is employed in the present work. Combinations of environmental and microphysical input parameters are used to compute a lookup table with a set of observable variables, e.g.,  $v_t$ ,  $E$  and  $Z$ . The observable variables are compared to the actually measured variables in order to come up with an estimation of ice crystal properties,  $F$  and  $N$ . We concentrate on the description and evaluation of the method and present one case study in which different ways of performing the retrieval are exercised.

The paper is structured as follows. Section 2 describes how the data used in the paper has been acquired. In Section 3 the method for deriving information about the PSD from both  $v_t$  and combined lidar/radar measurements is described. Section 4 presents example case studies. Conclusion and outlook are given in Section 5.

## 2 Data

The remote-sensing data used in the context of this work was acquired during the COLRAWI-2 campaign (Combined observations with lidar radar and wind profiler) at Richard-Aßmann-Observatory (RAO) of DWD in Lindenberg, Germany between 1 June 2015 and 30 September 2015 (Bühl et al., 2015). Figure 2 shows a case study of the combined measurements at Lindenberg. During the project, an ultra-high frequency (UHF) RWP was used to measure the vertical velocity of air ( $v_{\text{air}}$ ) in combination with measurements of  $Z$ , mean Doppler velocity  $v_D$  and spectral width  $w$  from a vertically pointing 35-GHz CR. The RWP was switching between vertically pointing and horizontal beam swinging each 30 min. This special observation mode of the RWP was necessary to acquire direct measurements of both horizontal and vertical air motions with only one RWP available. A Polly<sup>XT</sup> Raman lidar (Engelmann et al., 2016) pointing 5° off zenith was used for measurement of ice particle extinction coefficient ( $E$ ) which is derived at a wavelength of 1064 nm (Baars et al., 2017). For the sake of completeness also a Streamline XR Doppler lidar (Päschke et al., 2015) should be mentioned which was also observing vertical Doppler velocity  $v_{\text{DL}}$ . However, its measurements are left out of the retrieval method, because they (a) provide mainly redundant information

to the cloud radar and (b) pose additional problems in interpretation of optical signals due to specular reflection at the planar planes of horizontally oriented ice crystals.

A Cloudnet (Illingworth et al., 2007) dataset was derived from the lidar/CR/MWR measurements including the attenuation-corrected values of CR reflectivity used in this paper. The combined measurements of CR and RWP were used to derive a dataset of particle ensemble mean  $v_t$  with an error margin of about  $0.1 \text{ ms}^{-1}$  (Radenz et al., 2018). It is worth noting here that in the context of this work we use “uncertainty” to describe retrieval and methodological uncertainties and “errors” for measurement errors. This unique dataset is used here for the first time to test the retrieval method and give examples.

### 3 Methods

#### 3.1 Measuring terminal fall velocity

The retrieval presented in this paper is based on measurements of radar reflectivity factor  $Z$  and terminal fall velocity  $v_t$  with CR and RWP. Measuring  $Z$  and  $v_t$  of ice particles in clouds is difficult because different factors influence the CR Doppler spectrum of ice particles:

- Vertical air motions shift the Doppler spectrum in such a way that  $v_D = v_{\text{air}} + v_t$
- Turbulence and beam-width effects broaden the Doppler spectrum (Shupe et al., 2008)

The shift induced by vertical air motions can be removed if the magnitude of vertical air motion  $v_{\text{air}}$  is known. In Radenz et al. (2018) a method is presented for measuring  $v_t$  and  $v_{\text{air}}$  with a combination of CR and RWP. The method of Radenz et al. (2018) combines Doppler spectra observed by both instruments in order to remove influence of Rayleigh scattering on the otherwise Bragg-scattering-dominated RWP measurements, resulting in an undisturbed measurement of vertical air motions. The velocity scale of the CR Doppler spectrum is shifted by the measured vertical air motion in order to derive  $v_t$ . In the context of this work,  $v_t$  is of central importance for the retrieval of particle size. The proxy for particle size is the particle maximum diameter  $D$  (see Mitchell (1996)) which describes the diameter of a sphere just encircling the total ice crystal.

Mie scattering effects are neglected in the context of this work, because we aim on studying pristine ice particles. Signal attenuation by these ice particles is also negligible. Turbulence and beam-width broadening are also introducing artifacts. A strongly broadened CR Doppler spectrum might contain unphysical negative terminal fall velocities even after correction of mean vertical air motion. Such effects cannot be removed easily, but luckily they only affect the width and not the mean velocity of the spectrum, which is shown in Section 3.2.

#### 3.2 General principle of the retrieval method

In the present work, a method for deriving  $N$  and  $F$  of pristine ice particles from combined lidar/CR/RWP measurements is described. An analytical inversion of the measurement values of lidar, CR and RWP is not possible, so numerical inversion techniques have to be applied. For efficient and simple numerical implementation, a lookup table is used which contains

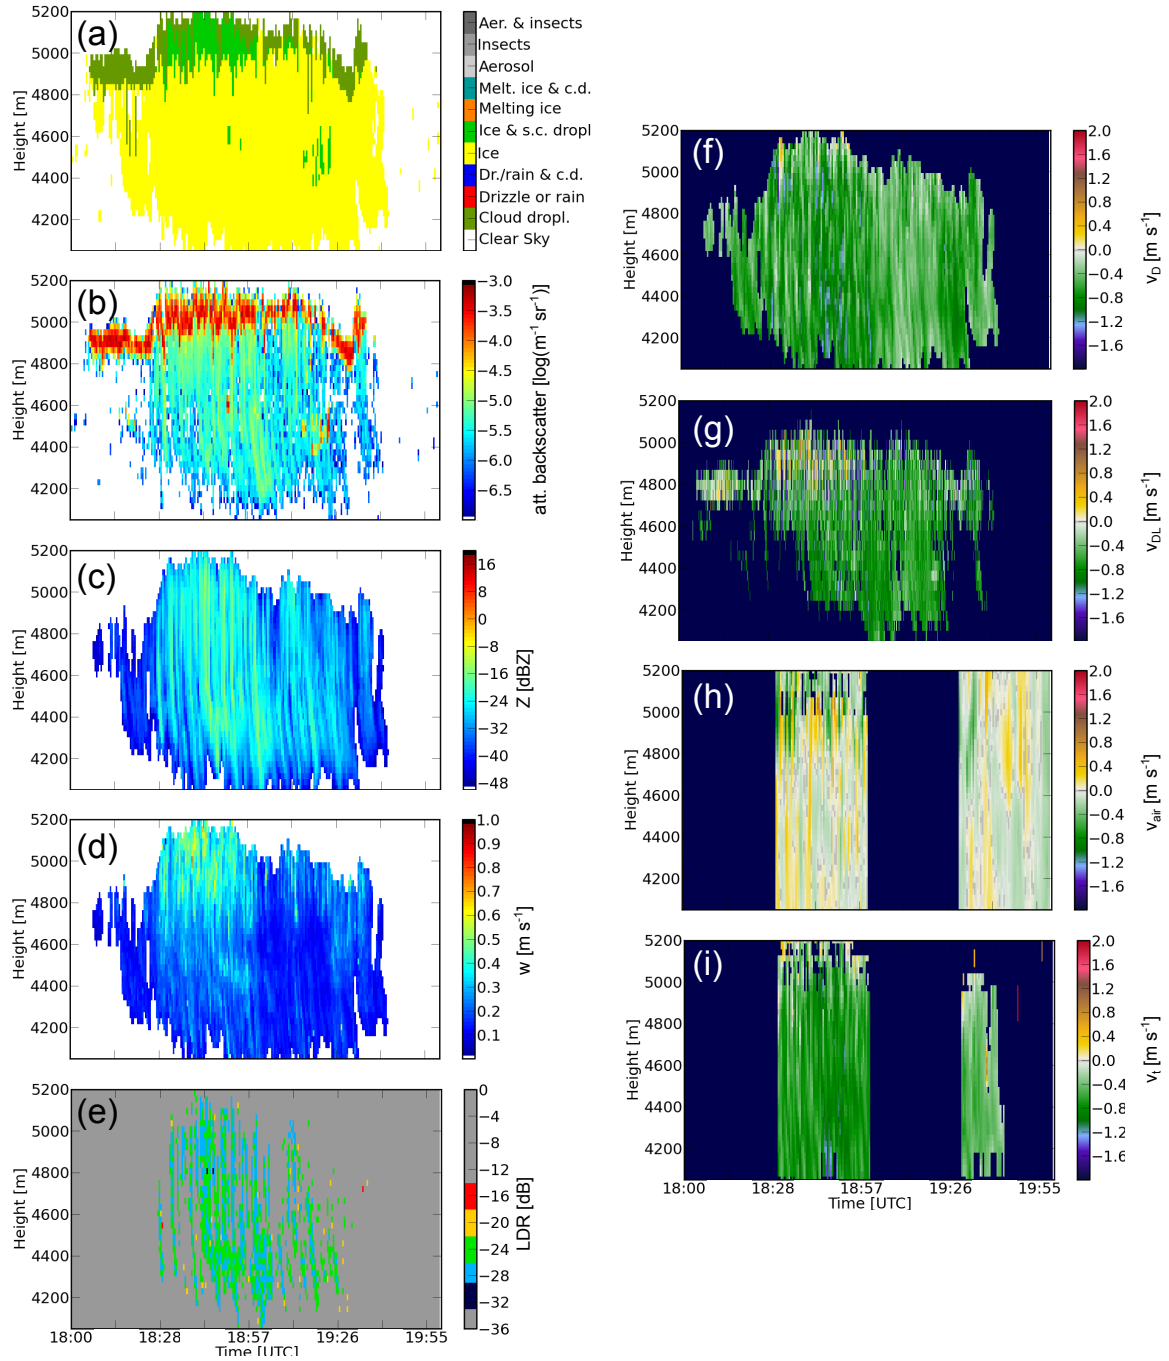

**Figure 2.** (a) Cloudnet target classification, (b) attenuated backscatter from lidar at 1064nm wavelength, (c) CR reflectivity  $Z$ , (d) CR Doppler spectral width  $w$ , (e) CR linear depolarization ratio (LDR), (f) CR Doppler velocity  $v_D$ , (g) Doppler lidar Doppler velocity  $v_{DL}$ , (h) vertical air motions as measured with the RWP  $v_{\text{air}}$  and (i) reflectivity weighted terminal fall velocity  $v_t$  are shown for a mixed-phase cloud layer observed on 11 June 2015 at Lindenberg.  $v_t$  and  $v_{\text{air}}$  are only available in half-hour intervals, because vertical and horizontal wind measurement modes of the RWP are alternating each 30 min.



the properties of the PSD and the observable measurement values  $Z$ ,  $E$ ,  $v_t$  and CR spectral width  $w$ . In this section, the mathematical foundations and assumptions for creating this lookup table are explained.

The basic measurement values that are used in the retrieval are the first three moments ( $Z$ ,  $v_t$  and  $w$ ) derived from the CR Doppler spectra which are corrected for vertical air motion. If no RWP measurements are available,  $v_t$  can be replaced by the ratio  $Z/E$  with  $E$  being the particle extinction coefficient measured by lidar. A retrieval is performed by trying to find a particle distribution that leads to the same variables as the measured ones. Figure 3 gives an example of this forward modeling approach. Two PSDs, characterized by different particle shapes of side planes and column-like particles, respectively, are defined in such a way that the simulated CR Doppler spectrum matches with the one measured. It is visible from this figure that different particle shapes can lead to very similar cloud radar spectra from significantly different PSDs. This is the case because the relationship between mass and terminal fall velocity are different for both particle populations “side planes” and “column-like“. For retrieving  $N$  and  $F$ , the simulation procedure is done first with a large variety of size distributions which are later compared to the measured values. A schematic overview of the retrieval method used here is given in Fig. 4.

Environmental factors affecting the shape of the CR Doppler spectra are taken into account during the computation of the lookup table. The signal strength of the CR is, e.g., affected by attenuation from water vapor and liquid water particles, air motion shifts the CR Doppler spectrum and turbulence broadens it. In the context of this work, water vapor attenuation is corrected with the method of Cloudnet (Illingworth et al., 2007). Particle attenuation is neglected since we concentrate on cloud layers, in which ice, liquid water and water vapor do not contribute significantly to cloud radar attenuation.

The modified gamma distribution from Delanoë et al. (2005) is assumed here, so we set for the PSD

$$N(D) = N_{\text{total}} C \left( \frac{D}{D_m} \right)^\mu \exp \left( - (4 + \mu) \frac{D}{D_m} \right) \quad (1)$$

with size parameter  $D_m$  (median particle maximum diameter), shape parameter  $\mu$  (describing the tilt of the distribution) and normalization factor  $C$  and the total ice number concentration  $N_{\text{total}}$ .  $C$  is chose in way so that  $\int_0^\infty N(D) dD = 1 \text{ m}^{-3}$ . In the context of this work, this normalization is done numerically. In consequence, all following extensive quantities are derived for a particle number concentration of one particle per cubic meter, indicated by a subscript “1“.

PSDs are simulated for all particle types mentioned in Table A2 and a variety of realistic combinations of the parameters pressure  $p$ , temperature  $T$ , CR spectral broadening  $\sigma_{\text{total}}$ , size parameter  $D_m$  and  $\mu$ . The ranges and step sizes for all parameters used in this study are found in Table 1.

The extensive properties  $N$  and  $F$  and the measurement quantities  $Z$  and  $E$  are not used as an input parameter in the forward modeling, because they all linearly depend on  $N$ . For the retrieval, only the shape ( $D_m$  and  $\mu$ ) of the distribution is of interest.

A CR Doppler spectrum of  $Z$

$$Z(D) = (K/0.93(6/(\pi 917.0))^2 N(D) m^2(D))/0.001^6 \quad (2)$$

is simulated with  $K = 0.174$  (dielectric constant for ice at 35 GHz) for ice particles, particle mass  $m(D)$  is obtained via Eq. B1 (Hogan et al., 2006). Only pristine particles are considered in the context of this work and all calculations are done for a CR

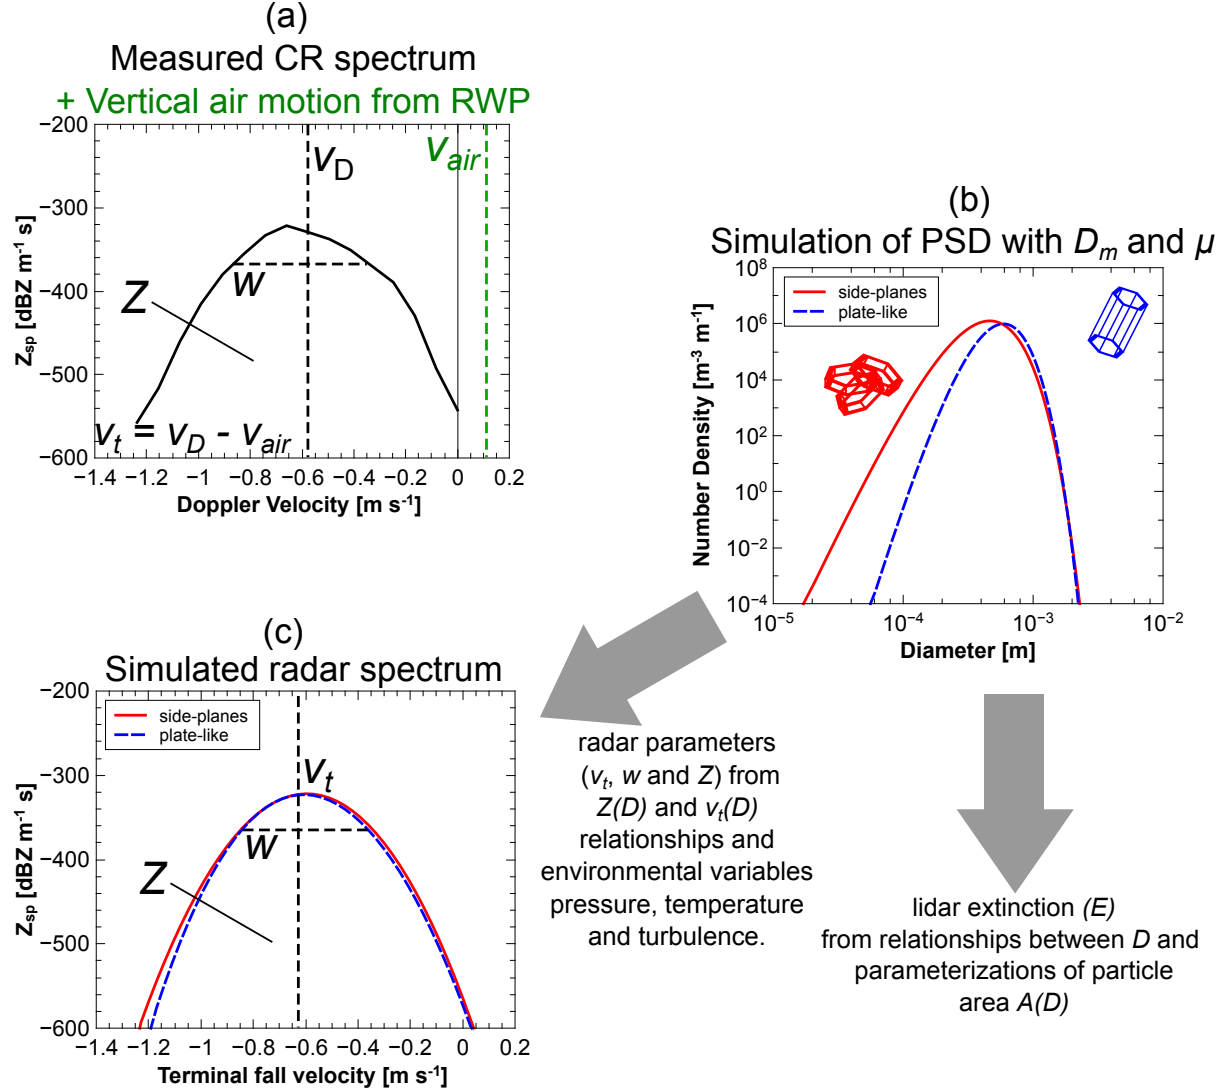

**Figure 3.** Illustration of the general idea of the retrieval. (a) Example CR Doppler spectrum measured at 4500 m height with the CR at Lindenberg on 11 June 2015 at 19:00 UTC (see Fig. 2) with spectral radar reflectivity ( $Z_{sp}(v) = Z(v)/\Delta v$  with Doppler spectrum grid length  $\Delta v = 0.08 \text{ m s}^{-1}$ ) first three moments  $Z = \int Z(v) dv$ ,  $v_t$  and  $w$ . (b) PSDs for two different particle populations. (c) Simulated  $Z_{sp}$  from both PSDs with the same moments as the measured variables.

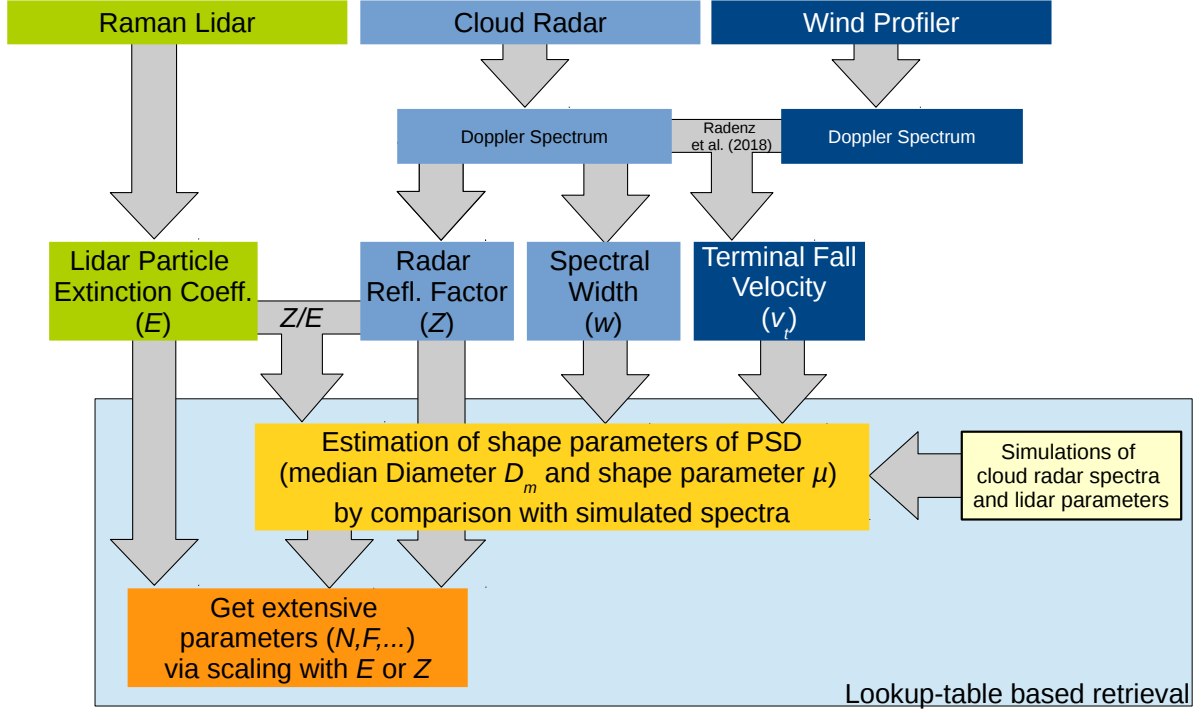

**Figure 4.** Flowchart of the retrieval algorithm, illustrating the synthesis of data from the remote-sensing instruments with the simulated parameters.

**Table 1.** Ranges and step sizes for computation of the lookup table

| Parameter               | Range low         | Range high        | Step size          | Unit             |
|-------------------------|-------------------|-------------------|--------------------|------------------|
| $p$                     | 50                | 1050              | 50                 | hPa              |
| $T$                     | 180               | 270               | 10                 | K                |
| $\sigma_{\text{total}}$ | 0.05              | 0.5               | 0.1                | $\text{ms}^{-1}$ |
| $D_m$                   | $1 \cdot 10^{-5}$ | $5 \cdot 10^{-3}$ | $25 \cdot 10^{-6}$ | m                |
| $\mu$                   | 1                 | 61                | 1                  | -                |

with 35 GHz operation frequency (8.5 mm wavelength). Since the Mie parameter of these particles is usually smaller than 1, only Rayleigh scattering is considered in this context.

Accordingly, the extensive variables normalized to one particle per cubic meter are normalized number flux

$$F_1 = \int N(D)v(D)dD, \quad (3)$$

5 normalized radar reflectivity factor

$$Z_1 = \int Z(D)dD, \quad (4)$$

and normalized particle extinction coefficient

$$E_1 = 2 \times \int N(D)A(D)dD \quad (5)$$

with particle area  $A(D)$  obtained from Eq. B2.

10 From the two latter equations, the reflectivity-to-extinction ratio  $Z_1/E_1 = Z/E$  is defined.

For means of completeness, the mean terminal fall velocity measured with a Doppler lidar is given as

$$v_{t,DL} = 2 \times \int N(D)A(D)v(D)dD/E_1. \quad (6)$$

The latter formula assumes that the backscatter from all crystals is only proportional to their projected area. This requires all crystals to be either randomly oriented or aligned perpendicular to flow direction. Since this would complicate the discussion of the proof-of-concept approach presented here, we stick to cloud radar measurements of  $v_t$ . However, redundancy in observations of retrieved parameters increases the robustness of the methodology and quality of the analysis' products.

Simulation of microphysical parameters are only done over the ranges in which the particle properties are valid which are given in Table A1. The normalized number concentration

$$N_1 = \int N(D)dD \quad (7)$$

20 is computed in order to ensure that the PSD is well represented within the limits of  $D$ . The deviation of  $N_1$  from 1 indicates, how many particles are not considered due to the limited range of  $D$ . In the context of this work, we discard all calculations in which  $N_1 < 0.95$ , meaning that at maximum 5% of the particles at the upper and/or lower boundary may be not included.

As mentioned before, a proxy for particle size is the most crucial intensive parameter for the retrieval of  $N$ . In the present work we exploit measurements of  $v_t$  in order to come up with an estimation of the median diameter  $D_m$  of the gamma- $\mu$  distribution. Hence, in this section and in Appendix B, the relationship between  $D_m$ ,  $D_m$  and  $v_t$  is discussed. Mitchell (1996); Heymsfield and Westbrook (2010) and Khvorostyanov and Curry (2014) present an analytic theory for calculation of  $v_t$  of particles on the basis of four fractal parameters, describing mass and area of the particles in dependence of their maximum diameter  $D$  (minimum enclosing circle for ice crystals, particle diameter for droplets). The resulting formula is

$$v(D) = A_v \times D^{B_v} \quad (8)$$

with  $A_v$  and  $B_v$  also being functions of  $D$  dependent on the properties of the air surrounding the falling ice crystal. The detailed derivation of the formula is described in Appendix B. Flow-tunnel experiments, e.g., by Fukuta and Takahashi (1999) have produced the parameterizations of particle shapes needed for derivation of  $A_v$  and  $B_v$ . Tables A1 and A2 summarize these parameterizations for deriving mass  $m(D)$  and area ( $A(D)$ ) from maximum particle diameter ( $D$ ). The detailed derivation of the latter as well as of  $v(D)$  which is used in the following is given in Appendix B.

A CR Doppler spectrum is computed on the terminal-velocity grid by computing  $v(D)$  and inverting numerically to  $D(v)$ . The resulting spectrum  $Z(v(D))$  is artificially broadened by numerical folding with the normalized Gaussian distribution term

$$(2\pi\sigma_{\text{total}}^2)^{-1} \times \exp(-0.5 \frac{v^2}{\sigma_{\text{total}}^2}) \quad (9)$$

with standard deviation  $\sigma_{\text{total}}$ , which introduces the combined effects of turbulence and beam width broadening. From this broadened spectrum  $v_t$  (first moment) and spectral width  $w$  (second central moment) are derived.

Such spectra are computed for a variety of input parameters ( $p$ ,  $T$ ,  $\sigma_{\text{total}}$ ,  $D_m$  and  $\mu$ ) and for each combination of input variables, the input and output parameters are collected in three vectors:

- $\mathbf{i}_L = (p, T, \sigma, D_m, \mu)_L$  holding the input properties that were used in the calculations.
- $\mathbf{p}_L = (v_t, w, Z/E)_L$  holding the intensive properties of the distribution
- $\mathbf{n}_L = (N_1, F_1, A_1)_L$  containing the normalized extensive properties of the distribution

with subscript  $L$  to indicate that these vectors are members of the lookup table. This lookup table containing the three vectors  $\mathbf{i}$ ,  $\mathbf{p}$  and  $\mathbf{n}$  is computed for a set of input variables of  $p$ ,  $T$ ,  $\sigma_{\text{total}}$ ,  $D$  and  $\mu$ .

### 3.3 Using terminal fall velocity for deriving maximum particle diameter

- The basis for the retrieval of  $N$  is an estimation of  $D_m$ . In this section, two relationships –  $v_t(D)$  and  $Z/E(D)$  – are compared for exemplary particle types and varying properties of the underlying PSD.  $v_t$  and  $Z/E$  can both be used to derive  $D_m$ , because both are steady and differentiable with  $D_m$ . It can be seen from Figure 5 that  $v_t$  and  $Z/E$  show a very similar dependence on  $D_m$ , which is not surprising since both are proportional to  $m$  and reciprocal to  $A$ . For the purpose of deriving the size and shape properties of a PSD both quantities are interchangeable and a direct measurement of  $v_t$  can replace a missing  $Z/E$ .
- More importantly, both  $v_t$  and  $Z/E$  only depend weakly on shape parameter  $\mu$  of the PSD and the resulting width  $w$  of the CR Doppler spectrum.

### 3.4 Retrieving a result from the lookup table

For retrieving  $N$ , an estimation of the PSD must be acquired first. This is done by comparison of measured parameters with those stored in the lookup table. An overview about the retrieval process is given in Fig. 6. Depending on which parameter

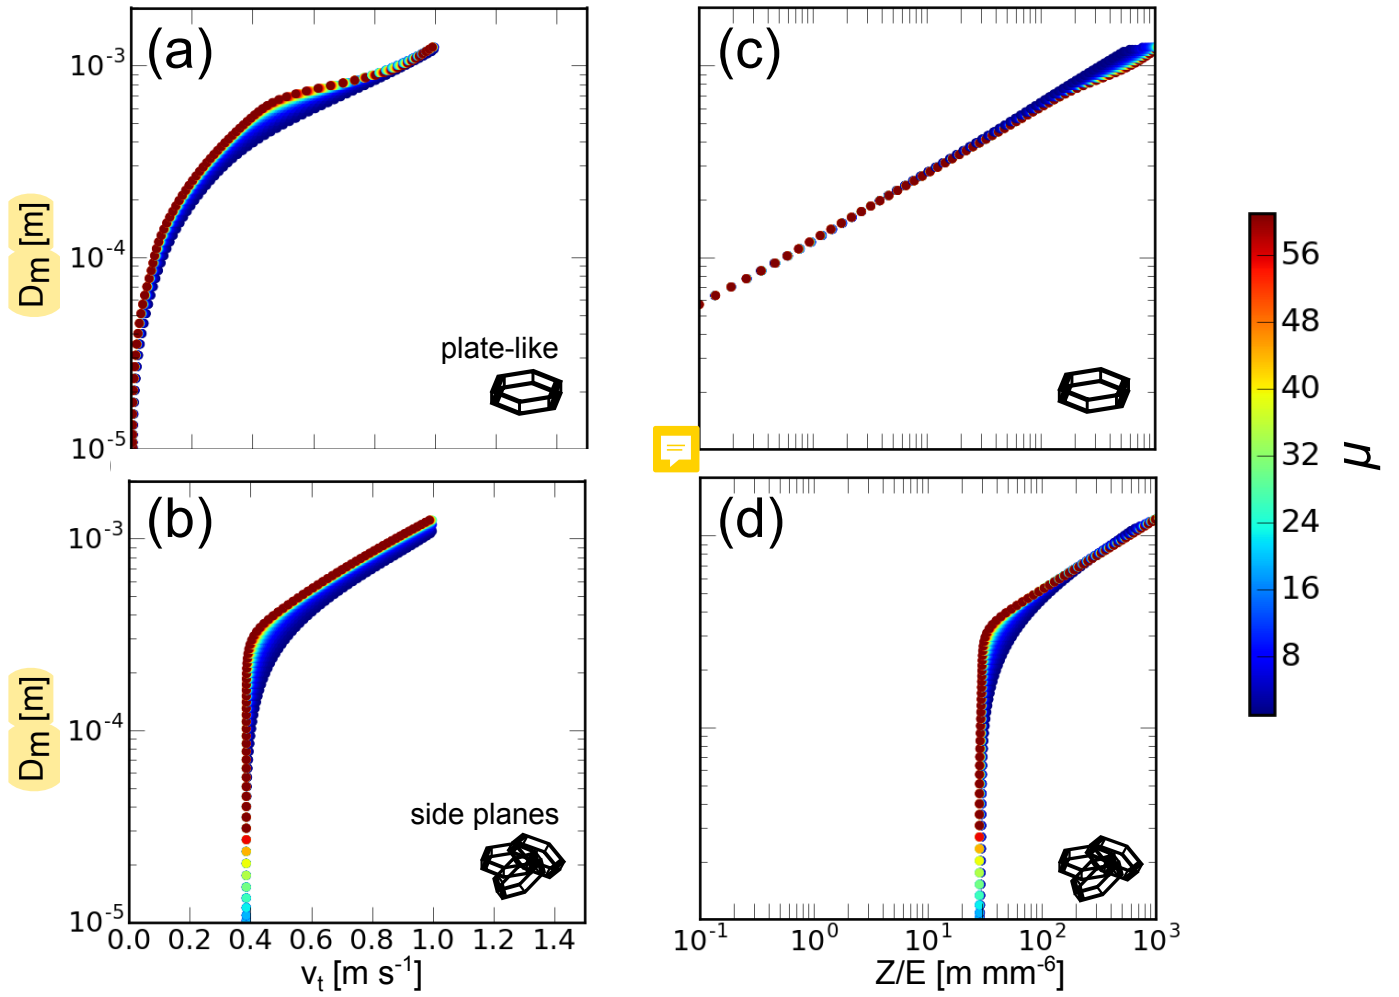

**Figure 5.** Relationship of  $v_t$  with  $D$  (a,b) and  $Z/E$  with  $D$  (c,d) for particles types “plate-like” (a,c) and “side planes” (b,d).  $v_t$  graphs are all plotted for  $p = 650$  hPa and  $T = 255$  K. See Table A2 and Table A1 for the particle properties.

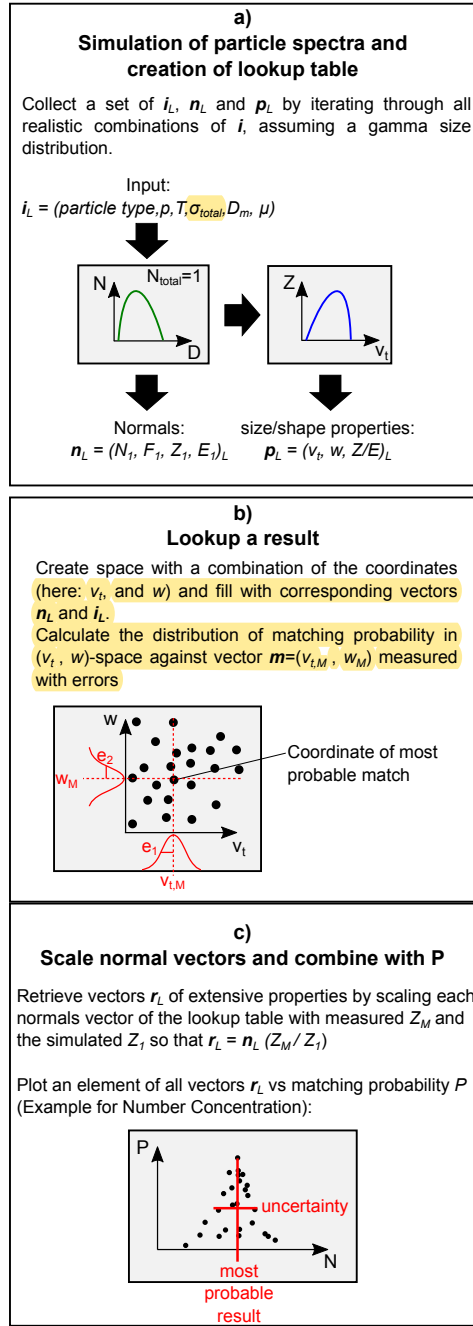

**Figure 6.** Step-by-step description of the retrieval principle. (a) A lookup table with parameters observable with lidar and radar is created with a set of combinations of particle shape,  $p$ ,  $T$ ,  $\sigma_{\text{total}}$ ,  $D_m$  and  $\mu$ . (b) The matching probability between the measured parameters and the simulated parameters is searched in the lookup table, resulting in estimations of  $D_m$  and  $\mu$ . (c) The PSD created with the retrieved estimations of  $D_m$  and  $\mu$  is scaled with extensive parameters measured with lidar or CR ( $E$  or  $Z$ , respectively). The full-width-half-max of the distribution of matching probabilities is considered the uncertainty of the retrieved results. More explanations are given in the text.

is available, this procedure can be done with all combinations of available intensive parameters (currently  $v_t$ ,  $w$  and  $Z/E$ ). Examples are given in Section 4.

**a) Retrieval and uncertainties estimation:**

A vector with the measured intensive properties  $\mathbf{m}$  is matched with the entries of the lookup table in order to derive  $D_m$  and  $\mu$  of the particle distribution. The vector  $\mathbf{m}$  can be composed of any combination of  $p$ ,  $T$ ,  $\sigma_{\text{total}}$ ,  $v_t$ ,  $w$  and  $Z/E$ , but in the context of this work only  $v_t$ ,  $w$  and  $Z/E$  are used as variational parameters for the retrieval. The matching probability of  $\mathbf{m}$  to its corresponding values in the lookup table is described by

$$P(\mathbf{p}_L, \mathbf{m}) = \exp[0.5 \sum_i (p_{L,i} - m_i)^2 / e_i^2] \quad (10)$$

with  $\mathbf{p}_L$  being the simulated properties from the lookup table,  $i$  index running over the length of  $\mathbf{p}_L$ ,  $\mathbf{m}$  containing the corresponding actual measurement values and  $e$  the uncertainties assuming a Gaussian error distribution.  $P$  is applied to all lines of the lookup table and the matching probability for each single entry is found. As a result a distribution of matching probabilities is derived. At the position of the maximum of all value of  $P$  the parameters of the size distribution are retrieved because they represent the best match for the input parameters. The full-width-half-max of  $P$  for each derived value is used to represent the uncertainty of the retrieval. Upper and lower uncertainty may differ, if the distribution of  $P$  is not symmetrical around its maximum. A larger uncertainty in one of the measured variables may lead to a broader distribution  $P$  for the retrieved variables (see Fig. 6).

**b) Scaling:**

With the shape of the size distribution known, also the normalized extensive parameters  $N_1, F_1, Z_1$  and  $E_1$  are known. A vector  $\mathbf{r}$  holding the results of extensive properties ( $N$ ,  $F$ ,  $Z$  and/or  $E$ ) is derived by multiplying all of them with the same scaling factor  $S$ , which can be either  $S_Z = Z/Z_1$  or  $S_E = E/E_1$ . Scaling adds the measurement uncertainty of  $Z$  (CR) or  $E$  (lidar).

**c) Example:**

As an example, a diagram relating  $F_1$  with the intensive properties  $v_t$  and  $w$  is shown in Fig. 7. The distribution of results in  $(v_t, w)$  space is shown. From this distribution the most probable solution (here  $F_1$ ) is selected for measurements of  $v_t$  and  $w$ . Multiplication of the selected extensive parameter with the corresponding factor  $Z/Z_1$  yields the scaling factor to derive the actual  $F$  and  $N$ . The method is here applied in a two dimensional example, but both extensive and intensive parameters can be of arbitrary number.

### 3.5 Estimation of cross-sensitivity of uncertainties

For estimating the uncertainties introduced by a measurement value on the retrieved quantities, the retrieval is performed for a fixed set of input parameters and afterwards each single parameter is being varied by one standard deviation. The errors are an estimation of maximum measurement accuracy that can be achieved currently. Table 2 gives a comparison of the errors derived for  $v_t$  and  $Z/E$ .



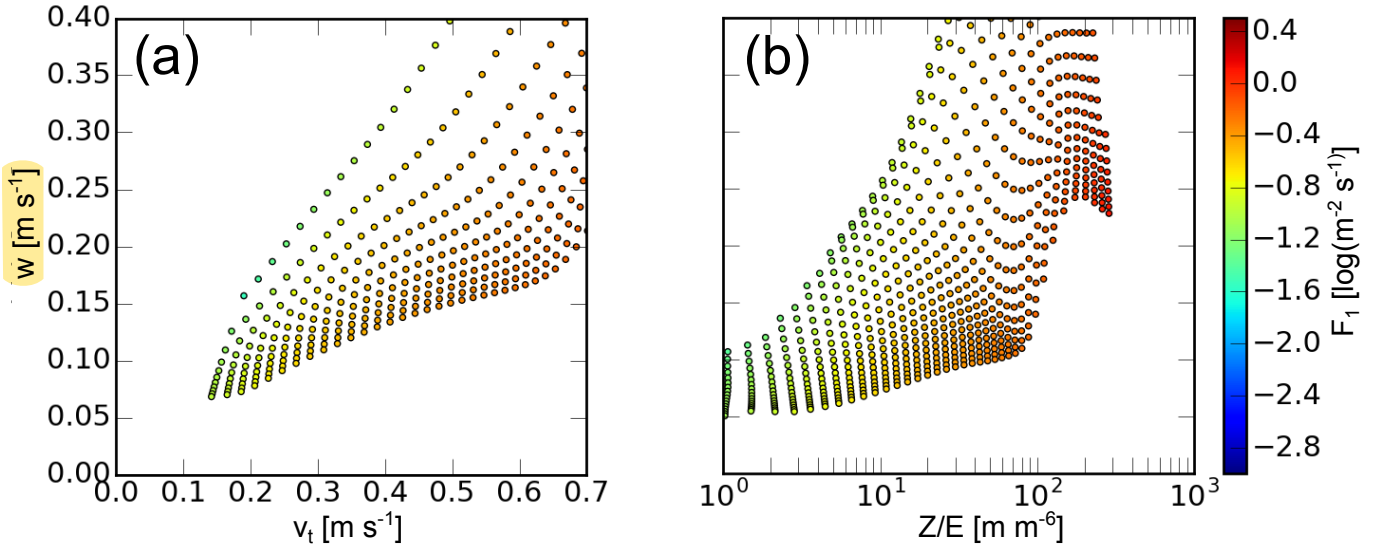

**Figure 7.** Example of a retrieval of  $F_1$  based on  $\mathbf{m} = (v_t, w)$  (a) and  $\mathbf{m} = (Z/E, w)$  (b) for the combined particle type “plate-like”.

The measurement errors of the parameters  $p$ ,  $T$  and  $\sigma_{\text{total}}$  were chosen quite large and, anyway, do not introduce significant errors. It can be seen from this table that for a relatively low  $v_t$  of  $0.3 \text{ ms}^{-1}$  an error of  $0.1 \text{ ms}^{-1}$  in  $v_t$  results in a factor of 3.0 uncertainty for  $Z_1$  and 0.5 for  $E_1$ . These results are significantly different for a larger  $v_t$  of  $0.9 \text{ ms}^{-1}$  which produces uncertainties of 0.5 and 0.2 for  $Z_1$  and  $E_1$ , respectively. The relatively large uncertainty of 70% in  $Z/E$  yields comparable lower uncertainty factors (0.4 for  $Z_1$  and 0.2 for  $E_1$ ). The relative errors derived for  $N$  and  $F$  are nearly identical because they are both derived from the same retrieved PSD. The question whether the PSD is scaled via  $E$  (error of  $\pm 40\%$ ) or  $Z$  (error of  $\pm 2 \text{ dB}$ ) makes a large difference for the retrieval uncertainties  $N$  and  $F$ . However, one has to keep in mind that the actual cause for the uncertainties  $N$  and  $F$  are the uncertainties in the underlying PSD.

In this analysis, only methodological errors and random measurement errors have been assumed. Also the influence of uncertainties in the calculation of fall speeds and choice of particles are left out of the estimation of uncertainties here. The assessment of their influences is actually not straight forward. Heymsfield and Westbrook (2010) found out that the method of Mitchell (1996) performs especially well for pristine ice crystals with observed differences in terminal fall velocity of 20% at maximum. For rimed ice crystals the error tend to increase significantly. Since conditions under which rimed particles occur are left out of this study, this can be ruled out as a major source of error. Also, introduction of an additional exponent in the calculation of the Best-number (as proposed by Heymsfield and Westbrook (2010)) does not change the results significantly. Uncertainties from the choice of particle type are also difficult to quantify. As long as the particles with a similar aspect ratio are chosen, the differences in the retrieved  $N$  are around 50%. As soon as a completely wrong type is chosen, e.g., columns instead of dendrites, the difference can be arbitrary, because often only a very exotic solution or just no solution is found.

**Table 2.** Ratios between the results of the original and the disturbed retrieval. Row “mean” gives the original input parameters and “error” one the standard deviation uncertainty that has been used for variation.

|                                  | mean   | error  | $D_m$ | $\mu$ | $E_1$ | $Z_1$ | $F_1$ | N and F       |               |
|----------------------------------|--------|--------|-------|-------|-------|-------|-------|---------------|---------------|
|                                  |        |        |       |       |       |       |       | scaled with E | scaled with Z |
| $p$ [pa]                         | 5.8E+4 | 5.0E+3 | 0.00  | 0.00  | 0.00  | 0.00  | -0.02 | 0.00          | 0.00          |
| $T$ [K]                          | 248.15 | 10.00  | 0.00  | 0.00  | -0.03 | -0.01 | -0.04 | -0.04         | -0.02         |
| $v_{total}$ [m s <sup>-1</sup> ] | 0.05   | 0.20   | 0.00  | 0.97  | 0.04  | 0.12  | 0.07  | 0.06          | 0.19          |
| $w$ [m s <sup>-1</sup> ]         | 0.30   | 0.10   | 0.35  | 0.61  | 0.50  | 3.08  | 0.40  | 0.70          | 5.02          |
|                                  | 0.90   | 0.10   | 0.10  | 0.20  | 0.20  | 0.50  | 0.10  | 0.28          | 0.82          |
| $Z/E$ [m mm <sup>-6</sup> ]      | 7.5    | 5      | -0.11 | -0.25 | -0.18 | -0.42 | -0.20 | -0.26         | -0.68         |
|                                  | 75     | 50     | -0.16 | -0.30 | -0.18 | -0.38 | -0.17 | -0.26         | -0.62         |
| width [m s <sup>-1</sup> ]       | 0.15   | 0.05   | 0.00  | -0.46 | -0.12 | -0.17 | -0.13 | -0.16         | -0.28         |

0.00 ... 0.10

0.10 ... 0.30

0.30 ... 1.00

1.00 ...

Uncertainty  
Factor

## 4 Results - Case Study

Figure 2 shows an altocumulus cloud observed during the COLRAWI-2 campaign at Lindenberg on 11 June 2015. The observed CTT is  $-10^\circ\text{C}$ . The measured CR LDR let us conclude that the ice particles present are most probably isometric ice crystals (Myagkov et al., 2016). Accordingly, the particle type “plate-like” is chosen for retrieving the microphysical parameters.

5 Technically it would be possible to set particle type also as a retrieved parameter. However, the only measured parameter directly sensitive to particle shape would be cloud radar linear depolarization ratio (LDR), which is difficult to forward model and only rarely measured throughout the cloud case due to limitations in instrumental sensitivity. To avoid ambiguous results, we analyze the particle type manually and set it fixed for the whole cloud case. Otherwise the retrieved results would alternate between different particle types, introducing additional complications into the analysis.

10 The retrieval is done with three forms of the measurement vector which is used for the retrieval:

In the **first mode**,  $Z$  is the scaling variable and  $\mathbf{m} = (v_t, w)$  with a fixed error vector  $\mathbf{e} = (0.15\text{ms}^{-1}, 0.1\text{ms}^{-1})$ . In this mode, only RWP and CR are used.  $v_t$  is measured with the method of Radenz et al. (2018) and attenuation corrected CR measurements of  $Z$  and  $w$  are also used for the retrieval.  $p$  and  $T$  are acquired from the European Center for Medium-Range Weather Forecast Integrated Forecast (ECMWF IFS) dataset. Figure 8(a) shows the result of the lookup-table-based retrieval with the measurement vector  $\mathbf{m} = (v_t, w)$  and  $Z$  as scaling variable. The retrieval shows plausible results for  $D$ ,  $\mu$ ,  $N$  and  $F$  with about half an order of magnitude uncertainty which is relatively constant all over the case. The large uncertainty results from a very broad probability distribution due to a stronger change at low values of  $v_t(D_m)$  for this particle type (see Fig. 5) at low fall velocities.

In the **second mode**, all parameters are the same, except that  $\mathbf{m} = (Z/E, w)$  and  $\mathbf{e} = ((\Delta Z + \Delta E) \cdot Z/E, 0.1\text{ms}^{-1})$  with relative errors  $\Delta Z = 0.2$  and  $\Delta E = 0.1$ . Extinction is derived by multiplication of the lidar backscatter  $\beta$  with a lidar ratio of  $32\text{Sr}^{-1}$  which is typical for ice crystals (Haarig et al., 2016), using the Klett-Fernald approach (Seifert et al., 2007). In the latter case, only lidar and cloud radar are used for retrieval. The third mode uses a combination of all available measurement with  $\mathbf{m} = (Z/E, v_t, w)$ , essentially combining both approaches. Figure 8(b) shows the results of this run.

A **third mode** with  $\mathbf{m} = (Z/E, v_t, w)$  is presented in Fig. 9. Again, all other setting and parameters are the same. In this mode, a lot of pixel do not show a solution. Yet, for those where a solution is found, the magnitude of the results derived with this combined measurement vector are essentially the same as with the measurement vectors  $(v_t, w)$  and  $(Z/E, w)$ . This is

plausible because in the first two modes, noise from random variations in  $Z$ ,  $E$  and  $v_t$  cannot be identified. The combined mode taking into account all three measurement values leads to a selection of only those results where the retrievals based on  $Z/E$  and  $v_t$  are fitting together.

In all three modes, uncertainties are derived from the distribution of  $P$  just as indicated in Fig. 6. As a means of quality control, values are only taken into account if  $P > 0.9$  meaning that the retrieval is within the limits and a realistic solutions is found. Representative uncertainties of  $N$  and  $F$  are listed in Table 3 and a factor of 4 for the first mode, about a factor of 2 for the second and below a factor of 2 for the third mode. Histograms of the retrieved  $N$  and  $F$  for all modes are given in Figure 10.

Averaged and median results for  $N$  and  $F$  for all four combinations of particle types and retrieval methods are also given in Table 3 for the height of 4500 m. At this single height, particle properties can be assumed constant in order to avoid additional stray of the retrieval caused by natural variations. It is obvious that a low number of large outliers influence the average, so the median is a better suited for comparison of the results in this context showing mostly the intrinsic errors of the method. Based on the uncertainties of the individual retrieval results shown in Table 3 the results agree within on standard deviation of uncertainty. The histograms of  $N$  and  $F$  show best agreement between the second (CR/lidar) and third run mode (CR/lidar/RWP). The first mode (CR/RWP) seems to have a cut off at  $N = 400 \text{ m}^{-3}$  and seems to tend more toward lower number concentrations. A small bias ( $\delta v_t \approx 0.05 \text{ ms}^{-1}$ ) could lead to such a tendency enforcing larger particles and, hence, smaller number concentrations. A positive bias in cloud radar, in turn, would result in too large values in the second run mode.

**Table 3.** Means, median and errors for retrieval of  $N$  and  $F$  for case study for different versions of  $m$  at 4500 m height.

| measurement vector $m$ | mean $N$ | median $N$ | mean $F$ | median $F$ | averaged upper/lower uncertainty factors |
|------------------------|----------|------------|----------|------------|------------------------------------------|
| $(v_t, w)$             | 2700     | 80         | 300      | 40         | +4/-4                                    |
| $(Z/E, w)$             | 2500     | 360        | 300      | 130        | +2/-1.5                                  |
| $(Z/E, v_t, w)$        | 700      | 382        | 190      | 150        | +1.3/-1.2                                |

## 5 Conclusions and Discussion

A method has been demonstrated to retrieve the size and shape parameters of PSDs from a combination of  $E$ ,  $Z$ ,  $w$  and/or  $v_t$ . All combinations of measured parameters have been tested and are found to produce results within the same order of magnitude. Uncertainties of the retrieval based on  $v_t$  are found to be larger than for the estimation based on  $Z/E$ . Smallest uncertainties are found if all measurement values ( $E$ ,  $Z$ ,  $w$  and  $v_t$ ) are taken into account, however, at the cost of a lower number of retrieved results. Largest retrieval uncertainties occur at smaller  $v_t$  for which the change of  $D$  with  $v_t$  is especially strong.

The method has its limitations only in the signal thresholds of the instruments (CR, lidar and/or RWP) and the a priori knowledge about the shape of the observed particles. In the current study, the CR has a signal threshold of about  $-55 \text{ dBZ}$  at a height of 5km (Görsdorf et al., 2015), the PollyXT lidar can make useful measurements of cloud particle extinction down

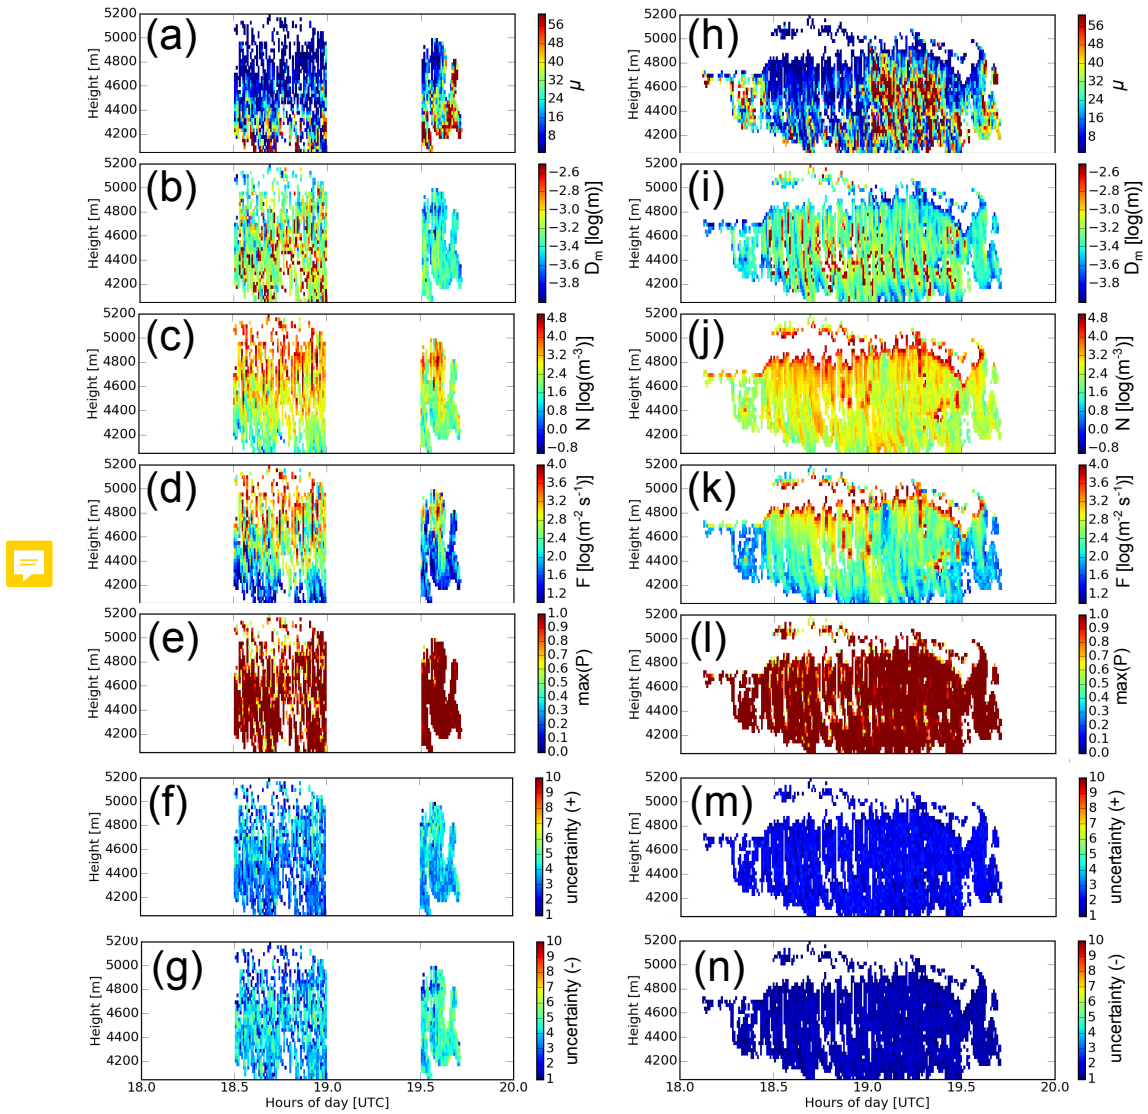

**Figure 8.** Results of retrieval based on  $v_t$  and  $w$  (left column) and  $Z/E$  and  $w$  (right column) for the particle type “plate-like”. Combined CR / RWP measurements are only available in the second half of each hour. Different retrieved parameters are shown: (a,h) spectral width parameter  $\mu$ , (b,i) median Diameter  $D_m$ , (c,j) number concentration  $N$  and (d,k) particle number flux  $F$ . Maximum probability of  $P$  for each retrieval (e,l) are shown together with upper (f,m) and lower (g,n) uncertainty factors for retrieved parameters

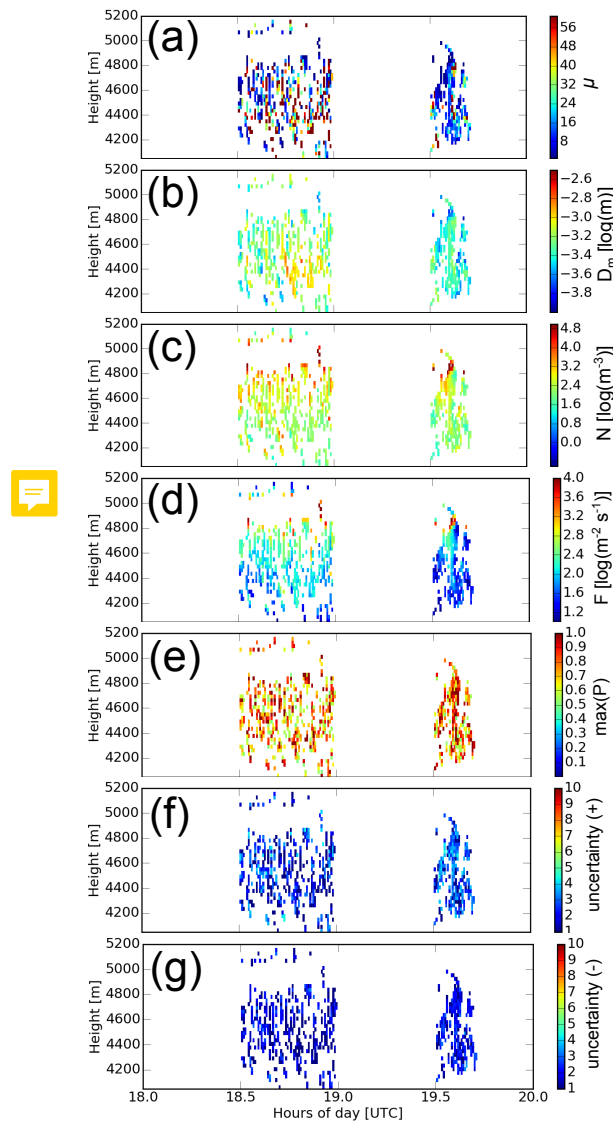

**Figure 9.** The same as Fig. 8 but with the combined approach taking into account  $Z/E$ ,  $v_t$  and  $w$ .

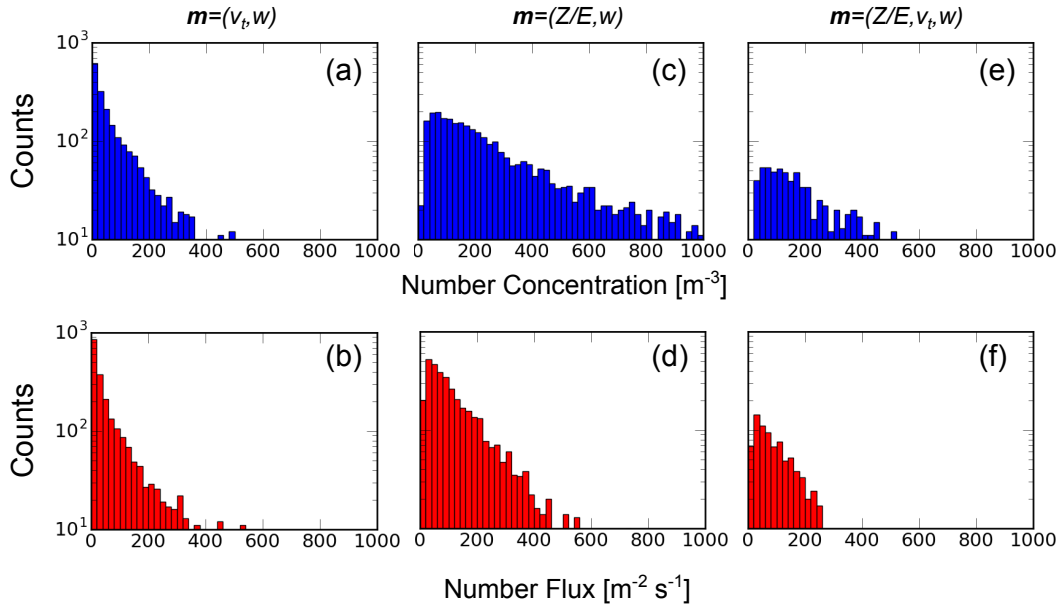

**Figure 10.** The distribution of retrieved results for  $N$  and  $F$  with first (a,b), second (c,d) and third retrieval mode (e,f). The corresponding measurement vector  $\mathbf{m}$  for each retrieval mode is indicated in the top row.

to about  $50 \text{ Mm}^{-1}$  (Bühl et al., 2013). The RWP is able to derive direct measurements of vertical velocity up to 6 km (Radenz et al., 2018). Since the latter limitation is due to Bragg scattering it is essentially independent of the other instruments' signal thresholds. Hence, given a detection of vertical velocity by the RWP, the method presented here can be used to measure  $N$  down to about  $10 \dots 100$  particle per  $\text{m}^{-3}$  (assuming a median diameter of about  $800 \mu\text{m}$ ) at a range of 5 km based on the sensitivity of the cloud radar. Such particle concentrations are usually too small to be detected by lidar, hence, the method presented here has an advantage over existing methods combining only lidar and radar.

The paper presents a first step towards the usage of the unique direct measurements of  $v_t$  of pristine ice particles for retrieval of their size, shape and number concentration. The forward modeling method used here for derivation of the observable measurement parameters is simple, but any other methods for CR forward modeling (Kollias et al., 2011) may be applicable for computation of the lookup table. The present work also shows that it might be beneficial to use  $v_t$  derived from combined CR/RWP measurements in other forward iterating models like the one of Ceccaldi et al. (2013); Cazenave et al. (2019).

The presented method is essentially applicable to all remote-sensing facilities that provide lidar particle extinction coefficient and CR (e.g. from the European Aerosols Clouds and Trace gases Infrastructure or the US program for Atmospheric Radiation Monitoring). Combinations of lidar and radar prove most robust in terms of retrieval uncertainties. However, an error of less than  $0.1 \text{ ms}^{-1}$  also allows keeping methodological uncertainties for a retrieval of  $N$  and  $F$  in the range between a factor of 0.5 and 3, which brings the method to the edge of applicability. The method is crucial for investigation of nucleation and growth of ice particles in optically thick clouds for which no other method can provide accurate estimations of  $N$  and  $F$ .

The forward model used here is transparent and instructive, but other forward iteration methods might be used in future as well. In the context of this work, the lookup table approach is used primarily for an analysis of retrieval uncertainties due to input measurement errors. Typing of the pristine particles on the basis of radar depolarization measurements is crucial for the methodology presented here. It is currently a field of intensive research (Bühl et al., 2016; Myagkov et al., 2016) and is, hence, left out of this work. The same applies to the accurate calibration of the CR which is a necessary prerequisite for the technique presented here (Ewald et al., 2017), but also not covered in the present work.

Several issues need a solution for successful application of the method in future:

- **Automatic particle typing must be improved.** Recently developed methods, employing scanning techniques (Myagkov et al., 2016) are more sophisticated and especially show better performance under low signal conditions. Those techniques were not yet available during the COLRAWI-2 campaign, but pose great opportunities for future application in the context of the present work.
- Uncertainties in CR calibration have not been taken into account here, because those errors are essentially unknown. However, great effort is going on to come up with a solution for this problem.
- Matching between the CR and lidar beam has to be improved in order to avoid artifacts under complex situations.
- Direct information about local turbulence have to be taken into account to avoid errors in the estimation of the shape parameter  $\mu$ .

Given the downside of less flexibility, there are distinct advantages of the lookup table approach over classic forward iteration methods. E.g., all possible results within the uncertainty range of the input variables are found at once. There is no risk that the method “gets stuck” in a local minimum. A lookup table approach also has the distinct advantage that numerical forward modeling and the actual retrieval are fully separable. Challenges of the approach are extensive memory needs and more effort in evaluation of the results. The method is transparent and it can be implemented easily in a numerically very efficient way. The computation of a case study as shown, e.g., in Fig. 8 takes less than a second on a state of the art desktop computer including estimation of retrieval uncertainties.

## Appendix A: Mass and area power law relationships

Table A1 gives parameterizations of  $m$  and  $A$  for different particle types according to Mitchell (1996). All values are given in cgs notation. Conversion to SI system is done with the formula

$$\alpha_{\text{SI}} = \alpha_{\text{CGS}} * 100^{\beta_{\text{CGS}}} / 1000 \quad (\text{A1})$$

$$\gamma_{\text{SI}} = \alpha_{\text{CGS}} * 100^{\sigma_{\text{CGS}}} / 10000. \quad (\text{A2})$$

The lookup table used in this paper is computed for all particle types with a single parameterization from Table A1. Additional particle shapes are defined in Table A2 that include a transition to aggregate particle types at the upper limit of  $D$ .

**Table A1.** Values for  $\alpha$ ,  $\beta$ ,  $\gamma$  and  $\sigma$  as well as their valid ranges ( $D_{\min} \dots D_{\max}$ ) used in the context of this work.

| Particle Type                  | $D_{\min}$ | $D_{\max}$ | $\alpha_{\text{CGS}}$ | $\beta_{\text{CGS}}$ | $\gamma_{\text{CGS}}$ | $\sigma_{\text{CGS}}$ |
|--------------------------------|------------|------------|-----------------------|----------------------|-----------------------|-----------------------|
| Hexagonal Plates               | 0          | 99         | 0.0065                | 2.45                 | 0.24                  | 1.85                  |
|                                | 99         | 400        | 0.00739               | 2.45                 | 0.65                  | 2                     |
| Hexagonal Columns              | 0          | 99         | 0.1677                | 2.91                 | 0.684                 | 2                     |
|                                | 99         | 300        | 0.00166               | 1.91                 | 0.0696                | 1.5                   |
|                                | 300        | 600        | 0.000907              | 1.74                 | 0.0512                | 1.414                 |
| Rimed Long Columns             | 600        | 2000       | 0.00145               | 1.8                  | 0.0512                | 1.414                 |
| Sector Branched Crystal        | 0          | 40         | 0.00614               | 2.42                 | 0.24                  | 1.85                  |
|                                | 40         | 8000       | 0.00142               | 2.02                 | 0.55                  | 1.97                  |
| Broad Branched Crystal         | 0          | 100        | 0.00583               | 2.42                 | 0.24                  | 1.85                  |
|                                | 100        | 1000       | 0.000516              | 1.8                  | 0.21                  | 1.76                  |
| Stellar Crystal Broad Arms     | 0          | 90         | 0.00583               | 2.42                 | 0.24                  | 1.85                  |
|                                | 0          | 1500       | 0.00027               | 1.67                 | 0.11                  | 1.63                  |
| Densely rimed dendrides        | 0          | 4000       | 0.015                 | 2.3                  | 0.21                  | 1.76                  |
| Side planes                    | 0          | 2500       | 0.00419               | 2.3                  | 0.2285                | 1.88                  |
| Bullet Rosettes                | 0          | 1000       | 0.00308               | 2.26                 | 0.0869                | 1.57                  |
| Aggregates side planes         | 0          | 1000000    | 0.0033                | 2.2                  | 0.02285               | 1.88                  |
| Aggregates thin planes         | 600        | 1000000    | 0.00145               | 1.8                  | 0.2285                | 1.88                  |
| Aggregates mixture             | 0          | 8000       | 0.0028                | 2.1                  | 0.2285                | 1.88                  |
| Assemblage planar polycrystals | 0          | 1000000    | 0.00739               | 2.45                 | 0.2285                | 1.88                  |
| Lump graupel                   | 500        | 3000       | 0.049                 | 2.8                  | 0.5                   | 2                     |
| Hail                           | 5000       | 25000      | 0.466                 | 3                    | 0.625                 | 2                     |

**Table A2.** Combined particles types used in the context of this work

| Combined type No. | Combined type Name | Parameterizations  | Ranges              |
|-------------------|--------------------|--------------------|---------------------|
| 1                 | plate-like         | Hexagonal Plates   | 0...600 $\mu m$     |
|                   |                    | Aggregates mixture | 600...3000, $\mu m$ |
| 2                 | column-like        | Hexagonal Columns  | 0...400 $\mu m$     |
|                   |                    | Rimed long columns | 600...2000 $\mu m$  |



## Appendix B: Calculation of terminal fall velocity

This appendix gives a detailed description for the actual calculation of  $v_t$  of particles with known parameterizations of particle mass  $m$  and area  $A$ . It is mentioned here for the sake of completeness. We follow here the method described in (Khvorostyanov and Curry, 2014).

$$5 \quad m(D) = \alpha D^\beta \quad (\text{B1})$$

$$A(D) = \gamma D^\sigma \quad (\text{B2})$$

$$g = 9.81 \text{ms}^2,$$

The density of the air

$$\rho_{\text{air}} = p/(R_{\text{air}}T) \quad (\text{B3})$$

$$10 \quad \text{with } R_{\text{air}} = 287.058 \text{ J kg}^{-1} \text{ K}^{-1} \text{ and kinematic viscosity}$$

$$\nu = \eta_{\text{air}}/\rho_{\text{air}} \quad (\text{B4})$$

with  $\eta_{\text{air}} = 1.59e-5 + (1.725e-5 - 1.59e-5) * (T - 250.0)/25.0 \text{ kg m}^{-1} \text{ s}^{-1}$  are used to derive the “Best-Number”

$$X(D) = 2m_D(1 - \rho_{\text{air}}/\rho_p)gD^2/(A_D\rho_p\nu^2). \quad (\text{B5})$$

The two constants

$$15 \quad b_{\text{Re}} = C_1 X^{0.5}/(2((1 + C_1 X^{0.5})^{0.5} - 1)(1 + C_1 X^{0.5})^{0.5}) \quad (\text{B6})$$

$$a_{\text{Re}} = \delta_0^2/4.0((1 + C_1 X^{0.5})^{0.5} - 1)^2/X^{b_{\text{Re}}} \quad (\text{B7})$$

with  $C_1 = 4/(\delta_0^2 C_0^{0.5})$  are defined. The different constants that apply for different particle types are defined in Table B1. The Reynolds number

$$Re(D) = a_{\text{Re}}(D)X(D)^{b_{\text{Re}}(D)} \quad (\text{B8})$$

$$20 \quad \text{is derived and two additional functions are defined:}$$

$$A_v = a_{\text{Re}}\nu^{1-2b_{\text{Re}}}(2\alpha g/(\rho_{\text{air}}\gamma))^{b_{\text{Re}}} \quad (\text{B9})$$

$$B_v = b_{\text{Re}} * (\beta - \sigma + 2) - 1 \quad (\text{B10})$$

With these results,  $v_t$  can be expressed as a closed function of  $D$ .

$$v(D) = A_v(D) \times D^{B_v(D)} \quad (\text{B11})$$

**Table B1.** Parameters for velocity calculations (Boehm 1989,1992):

| Particle Type         | $C_0$ | $\delta_0$ | $\rho_p [\text{kg m}^{-3}]$ |
|-----------------------|-------|------------|-----------------------------|
| Ice crystals          | 0.6   | 5.83       | 934.0                       |
| Hail/graupel          | 0.292 | 9.06       | 934.0                       |
| Rain/Drizzle droplets | 0.292 | 9.06       | 1000.0                      |

## B1

*Author contributions.* Johannes Buehl initiated the COLRAWI measurements, conceived the retrieval method and wrote the paper. Patric Seifert and Martin Radenz contributed methods for data evaluation and interpretation. Holger Baars evaluated the Raman-lidar data. Albert Ansmann supervised the work and supported the manuscript preparation.

*Competing interests.* The authors declare no competing interests.

*Acknowledgements.* The research leading to these results has received funding from the European Union’s Horizon 2020 research and innovation programme under grant agreement no. 654109 (ACTRIS-2) and previously from the European Union Seventh Framework Programme (FP7/2007–2013) under grant agreement no. 262254 (ACTRIS) and no. 603445 (BACCHUS) as well as from the Cloudnet project (European Union contract EVK2-2000-00611). We thank Volker Lehmann, Ulrich G6rsdorf and Ronny Leinweber of MOL/RAO Lindenberg for the lively cooperation and for performing the measurements with RWP, CR and DL. The PollyXT used in this study is under the supervision of Ina Mattis (DWD).

## References

- Baars, H., Seifert, P., Engelmann, R., and Wandinger, U.: Target categorization of aerosol and clouds by continuous multiwavelength-polarization lidar measurements, *Atmospheric Measurement Techniques*, 10, 3175–3201, <https://doi.org/10.5194/amt-10-3175-2017>, <https://www.atmos-meas-tech.net/10/3175/2017/>, 2017.
- 5 Battaglia, A., Westbrook, C. D., Kneifel, S., Kollias, P., Humpage, N., Löhnert, U., Tyynelä, J., and Petty, G. W.: G band atmospheric radars: new frontiers in cloud physics, *Atmospheric Measurement Techniques*, 7, 1527–1546, <https://doi.org/10.5194/amt-7-1527-2014>, <https://www.atmos-meas-tech.net/7/1527/2014/>, 2014.
- Bühl, J., Ansmann, A., Seifert, P., Baars, H., and Engelmann, R.: Towards a quantitative characterization of heterogeneous ice formation with lidar/radar: Comparison of CALIPSO/CloudSat with ground-based observations, *Geophysical Research Letters*, 40, 4404–4408, <https://doi.org/10.1002/grl.50792>, <http://dx.doi.org/10.1002/grl.50792>, 2013.
- 10 Bühl, J., Leinweber, R., Görsdorf, U., Radenz, M., Ansmann, A., and Lehmann, V.: Combined vertical-velocity observations with Doppler lidar, cloud radar and wind profiler, *Atmospheric Measurement Techniques*, 8, 3527–3536, <https://doi.org/10.5194/amt-8-3527-2015>, <http://www.atmos-meas-tech.net/8/3527/2015/>, 2015.
- Bühl, J., Seifert, P., Myagkov, A., and Ansmann, A.: Measuring ice- and liquid-water properties in mixed-phase cloud layers at the Leipzig Cloudnet station, *Atmospheric Chemistry and Physics*, 16, 10 609–10 620, <https://doi.org/10.5194/acp-16-10609-2016>, <http://www.atmos-chem-phys.net/16/10609/2016/>, 2016.
- 15 Cazenave, Q., Ceccaldi, M., Delanoë, J., Pelon, J., Groß, S., and Heymsfield, A.: Evolution of DARDAR-CLOUD ice cloud retrievals: new parameters and impacts on the retrieved microphysical properties, *Atmospheric Measurement Techniques*, 12, 2819–2835, <https://doi.org/10.5194/amt-12-2819-2019>, <https://www.atmos-meas-tech.net/12/2819/2019/>, 2019.
- 20 Ceccaldi, M., Delanoë, J., Hogan, R. J., Pounder, N. L., Protat, A., and Pelon, J.: From CloudSat-CALIPSO to EarthCare: Evolution of the DARDAR cloud classification and its comparison to airborne radar-lidar observations, *Journal of Geophysical Research: Atmospheres*, 118, 7962–7981, <https://doi.org/10.1002/jgrd.50579>, <https://agupubs.onlinelibrary.wiley.com/doi/abs/10.1002/jgrd.50579>, 2013.
- Delanoë, J., Protat, A., Testud, J., Bouniol, D., Heymsfield, A. J., Bansemer, A., Brown, P. R. A., and Forbes, R. M.: Statistical properties of the normalized ice particle size distribution, *Journal of Geophysical Research: Atmospheres*, 110, <https://doi.org/10.1029/2004JD005405>, <https://agupubs.onlinelibrary.wiley.com/doi/abs/10.1029/2004JD005405>, 2005.
- 25 Delanoë, J. and Hogan, R. J.: Combined CloudSat-CALIPSO-MODIS retrievals of the properties of ice clouds, *Journal of Geophysical Research: Atmospheres*, 115, <https://doi.org/10.1029/2009JD012346>, <https://agupubs.onlinelibrary.wiley.com/doi/abs/10.1029/2009JD012346>, 2010.
- Eidhammer, T., DeMott, P. J., Prenni, A. J., Petters, M. D., Twohy, C. H., Rogers, D. C., Stith, J., Heymsfield, A., Wang, Z., Pratt, K. A., Prather, K. A., Murphy, S. M., Seinfeld, J. H., Subramanian, R., and Kreidenweis, S. M.: Ice Initiation by Aerosol Particles: Measured and Predicted Ice Nuclei Concentrations versus Measured Ice Crystal Concentrations in an Orographic Wave Cloud, *Journal of the Atmospheric Sciences*, 67, 2417–2436, <https://doi.org/10.1175/2010JAS3266.1>, 2010.
- 30 Engelmann, R., Kanitz, T., Baars, H., Heese, B., Althausen, D., Skupin, A., Wandinger, U., Komppula, M., Stachlewska, I. S., Amiridis, V., Marinou, E., Mattis, I., Linné, H., and Ansmann, A.: The automated multiwavelength Raman polarization and water-vapor lidar Polly<sup>XT</sup>: the neXT generation, *Atmospheric Measurement Techniques*, 9, 1767–1784, <https://doi.org/10.5194/amt-9-1767-2016>, <https://www.atmos-meas-tech.net/9/1767/2016/>, 2016.

- Ewald, F., Gross, S., Hagen, M., Hirsch, L., and Delanoë, J.: Calibration of a 35-GHz Airborne Cloud Radar: Lessons Learned and Inter-comparison with a 94-GHz Airborne Cloud Radar, in: EGU General Assembly Conference Abstracts, vol. 19 of *EGU General Assembly Conference Abstracts*, p. 14871, 2017.
- Fukuta, N. and Takahashi, T.: The Growth of Atmospheric Ice Crystals: A Summary of Findings in Vertical Supercooled Cloud Tunnel Studies, *J. Atmos. Sci.*, 56, 1963–1979, [http://dx.doi.org/10.1175/1520-0469\(1999\)056<1963:TGOAIC>2.0.CO;2](http://dx.doi.org/10.1175/1520-0469(1999)056<1963:TGOAIC>2.0.CO;2), 1999.
- Görsdorf, U., Lehmann, V., Bauer-Pfundstein, M., Peters, G., Vavriv, D., Vinogradov, V., and Volkov, V.: A 35-GHz Polarimetric Doppler Radar for Long-Term Observations of Cloud Parameters—Description of System and Data Processing, *J. Atmos. Oceanic Technol.*, 32, 675–690, <http://dx.doi.org/10.1175/JTECH-D-14-00066.1>, 2015.
- Haarig, M., Engelmann, R., Ansmann, A., Veselovskii, I., Whiteman, D. N., and Althausen, D.: 1064 nm rotational Raman lidar for particle extinction and lidar-ratio profiling: cirrus case study, *Atmospheric Measurement Techniques*, 9, 4269–4278, <https://doi.org/10.5194/amt-9-4269-2016>, <https://www.atmos-meas-tech.net/9/4269/2016/>, 2016.
- Heymsfield, A. J. and Westbrook, C. D.: Advances in the estimation of ice particle fall speeds using laboratory and field measurements, *Journal of the Atmospheric Sciences*, 67, 2469–2482, <http://dx.doi.org/10.1175/2010JAS3379.1>, 2010.
- Hogan, R. J., Mittermaier, M. P., and Illingworth, A. J.: The retrieval of ice water content from radar reflectivity factor and temperature and its use in evaluating a mesoscale model, *Journal of Applied Meteorology and Climatology*, 45, 301–317, <http://dx.doi.org/10.1175/JAM2340.1>, 2006.
- Illingworth, A. J., Hogan, R. J., O'Connor, E. J., Bouniol, D., Delanoë, J., Pelon, J., Protat, A., Brooks, M. E., Gaussiat, N., Wilson, D. R., Donovan, D. P., Baltink, H. K., van Zadelhoff, G.-J., Eastment, J. D., Goddard, J. W. F., Wrench, C. L., Haeffelin, M., Krasnov, O. A., Russchenberg, H. W. J., Pirou, J.-M., Vinit, F., Seifert, A., Tompkins, A. M., and Willén, U.: Cloudnet, *Bulletin of the American Meteorological Society*, 88, 883–898, <http://dx.doi.org/10.1175/BAMS-88-6-883>, 2007.
- Khvorostyanov, V. I. and Curry, J. A.: Thermodynamics, kinetics, and microphysics of clouds, Cambridge University Press, 2014.
- Kneifel, S., Kulie, M., and Bennartz, R.: A triple-frequency approach to retrieve microphysical snowfall parameters, *Journal of Geophysical Research: Atmospheres*, 116, 2011.
- Kollias, P., Rémillard, J., Luke, E., and Szyrmer, W.: Cloud radar Doppler spectra in drizzling stratiform clouds: 1. Forward modeling and remote sensing applications, *Journal of Geophysical Research: Atmospheres*, 116, <https://doi.org/10.1029/2010JD015237>, <https://agupubs.onlinelibrary.wiley.com/doi/abs/10.1029/2010JD015237>, 2011.
- Korolev, A., McFarquhar, G., Field, P. R., Franklin, C., Lawson, P., Wang, Z., Williams, E., Abel, S. J., Axisa, D., Borrmann, S., Crosier, J., Fugal, J., Krämer, M., Lohmann, U., Schlenczek, O., Schnaiter, M., and Wendisch, M.: Mixed-Phase Clouds: Progress and Challenges, *Meteorological Monographs*, 58, 5.1–5.50, <https://doi.org/10.1175/AMSMONOGRAPH-D-17-0001.1>, <https://doi.org/10.1175/AMSMONOGRAPH-D-17-0001.1>, 2017.
- Lehmann, V. and Teschke, G.: Wavelet based methods for improved wind profiler signal processing, *Annales Geophysicae*, 19, 825–836, <https://hal.archives-ouvertes.fr/hal-00316878>, 2001.
- Mitchell, D. L.: Use of mass- and area-dimensional power laws for determining precipitation particle terminal velocities, *Journal of the Atmospheric Sciences*, 53, 1710–1723, [http://dx.doi.org/10.1175/1520-0469\(1996\)053<1710:UOMAAD>2.0.CO;2](http://dx.doi.org/10.1175/1520-0469(1996)053<1710:UOMAAD>2.0.CO;2), 1996.
- Mitchell, D. L., Garnier, A., Pelon, J., and Erfani, E.: CALIPSO (IIR–CALIOP) retrievals of cirrus cloud ice-particle concentrations, *Atmospheric Chemistry and Physics*, 18, 17 325–17 354, <https://doi.org/10.5194/acp-18-17325-2018>, <https://www.atmos-chem-phys.net/18/17325/2018/>, 2018.

- Mülmenstädt, J., Sourdeval, O., Delanoë, J., and Quaas, J.: Frequency of occurrence of rain from liquid-, mixed-, and ice-phase clouds derived from A-Train satellite retrievals, *Geophysical Research Letters*, 42, 6502–6509, <https://doi.org/10.1002/2015GL064604>, 2015.
- Myagkov, A., Seifert, P., Wandinger, U., Bühl, J., and Engelmann, R.: Relationship between temperature and apparent shape of pristine ice crystals derived from polarimetric cloud radar observations during the ACCEPT campaign, *Atmospheric Measurement Techniques*, 9, 3739–3754, <https://doi.org/10.5194/amt-9-3739-2016>, <http://www.atmos-meas-tech.net/9/3739/2016/>, 2016.
- Päschke, E., Leinweber, R., and Lehmann, V.: An assessment of the performance of a 1.5  $\mu\text{m}$  Doppler lidar for operational vertical wind profiling based on a 1-year trial, *Atmospheric Measurement Techniques*, 8, 2251–2266, <https://doi.org/10.5194/amt-8-2251-2015>, <https://www.atmos-meas-tech.net/8/2251/2015/>, 2015.
- Radenz, M., Bühl, J., Lehmann, V., Görsdorf, U., and Leinweber, R.: Combining cloud radar and radar wind profiler for a value added estimate of vertical air motion and particle terminal velocity within clouds, *Atmospheric Measurement Techniques*, 11, 5925–5940, <https://doi.org/10.5194/amt-11-5925-2018>, <https://www.atmos-meas-tech.net/11/5925/2018/>, 2018.
- Seifert, P., Ansmann, A., Müller, D., Wandinger, U., Althausen, D., Heymsfield, A. J., Massie, S. T., and Schmitt, C.: Cirrus optical properties observed with lidar, radiosonde, and satellite over the tropical Indian Ocean during the aerosol-polluted northeast and clean maritime southwest monsoon, *Journal of Geophysical Research: Atmospheres*, 112, <https://doi.org/10.1029/2006JD008352>, 2007.
- Sekelsky, S. M., Ecklund, W. L., Firda, J. M., Gage, K. S., and McIntosh, R. E.: Particle Size Estimation in Ice-Phase Clouds Using Multifrequency Radar Reflectivity Measurements at 95, 33, and 2.8 GHz, *Journal of Applied Meteorology*, 38, 5–28, [https://doi.org/10.1175/1520-0450\(1999\)038<0005:PSEIIP>2.0.CO;2](https://doi.org/10.1175/1520-0450(1999)038<0005:PSEIIP>2.0.CO;2), 1999.
- Shupe, M. D., Kollias, P., Poellot, M., and Eloranta, E.: On deriving vertical air motions from cloud radar Doppler spectra., *Journal of Atmospheric & Oceanic Technology*, 25, 547–557, 2008.
- Simmel, M., Bühl, J., Ansmann, A., and Tegen, I.: Ice phase in altocumulus clouds over Leipzig: remote sensing observations and detailed modeling, *Atmospheric Chemistry and Physics*, 15, 10453–10470, <https://doi.org/10.5194/acp-15-10453-2015>, <http://www.atmos-chem-phys.net/15/10453/2015/>, 2015.
- Sourdeval, O., Gryspeerd, E., Krämer, M., Goren, T., Delanoë, J., Afchine, A., Hemmer, F., and Quaas, J.: Ice crystal number concentration estimates from lidar–radar satellite remote sensing – Part 1: Method and evaluation, *Atmospheric Chemistry and Physics*, 18, 14327–14350, <https://doi.org/10.5194/acp-18-14327-2018>, <https://www.atmos-chem-phys.net/18/14327/2018/>, 2018.
- Steinhagen, H., Dibbern, J., Engelbart, D., Görsdorf, U., Lehmann, V., Neisser, J., and Neuschaefer, J. W.: Performance of the first European 482 MHz Wind Profiler Radar with RASS under operational conditions, *Meteorologische Zeitschrift*, 7, 248–261, <https://doi.org/10.1127/metz/7/1998/248>, <http://dx.doi.org/10.1127/metz/7/1998/248>, 1998.
- Sullivan, S. C., Hoose, C., and Nenes, A.: Investigating the contribution of secondary ice production to in-cloud ice crystal numbers, *Journal of Geophysical Research: Atmospheres*, 122, 9391–9412, <https://doi.org/10.1002/2017JD026546>, <https://agupubs.onlinelibrary.wiley.com/doi/abs/10.1002/2017JD026546>, 2017.
- Sun, Z. and Shine, K. P.: Studies of the radiative properties of ice and mixed-phase clouds, *Quarterly Journal of the Royal Meteorological Society*, 120, 111–137, <https://doi.org/10.1002/qj.49712051508>, 1994.
- Voigt, C., Schumann, U., Minikin, A., Abdelmonem, A., Afchine, A., Borrmann, S., Boettcher, M., Buchholz, B., Bugliaro, L., Costa, A., Curtius, J., Dollner, M., Dörnbrack, A., Dreiling, V., Ebert, V., Ehrlich, A., Fix, A., Forster, L., Frank, F., Fütterer, D., Giez, A., Graf, K., Groß, J.-U., Groß, S., Heimerl, K., Heinold, B., Häneke, T., Järvinen, E., Jurkat, T., Kaufmann, S., Kenntner, M., Klingebiel, M., Klimach, T., Kohl, R., Krämer, M., Krisna, T. C., Luebke, A., Mayer, B., Mertes, S., Molleker, S., Petzold, A., Pfeilsticker, K., Port, M.,

- Rapp, M., Reutter, P., Rolf, C., Rose, D., Sauer, D., Schäfler, A., Schlage, R., Schnaiter, M., Schneider, J., Spelten, N., Spichtinger, P., Stock, P., Walser, A., Weigel, R., Weinzierl, B., Wendisch, M., Werner, F., Wernli, H., Wirth, M., Zahn, A., Ziereis, H., and Zäger, M.: ML-CIRRUS: The Airborne Experiment on Natural Cirrus and Contrail Cirrus with the High-Altitude Long-Range Research Aircraft HALO, *Bulletin of the American Meteorological Society*, 98, 271–288, <https://doi.org/10.1175/BAMS-D-15-00213.1>, <https://doi.org/10.1175/BAMS-D-15-00213.1>, 2017.
- 5 Westbrook, C. and Illingworth, A.: The formation of ice in a long-lived supercooled layer cloud, *Quarterly Journal of the Royal Meteorological Society*, 139, 2209–2221, 2013.
